# Supplementary material for: Imaging specific proteins in living cells with small unnatural amino acid attached Raman reporters
Source: Royal Society of Chemistry journal article supplement (doi:10.1039/d4an00758a), 2024-01-01
Supplement: d4an00758a1.pdf [file d4an00758a1.pdf]

## Supplementary Figures

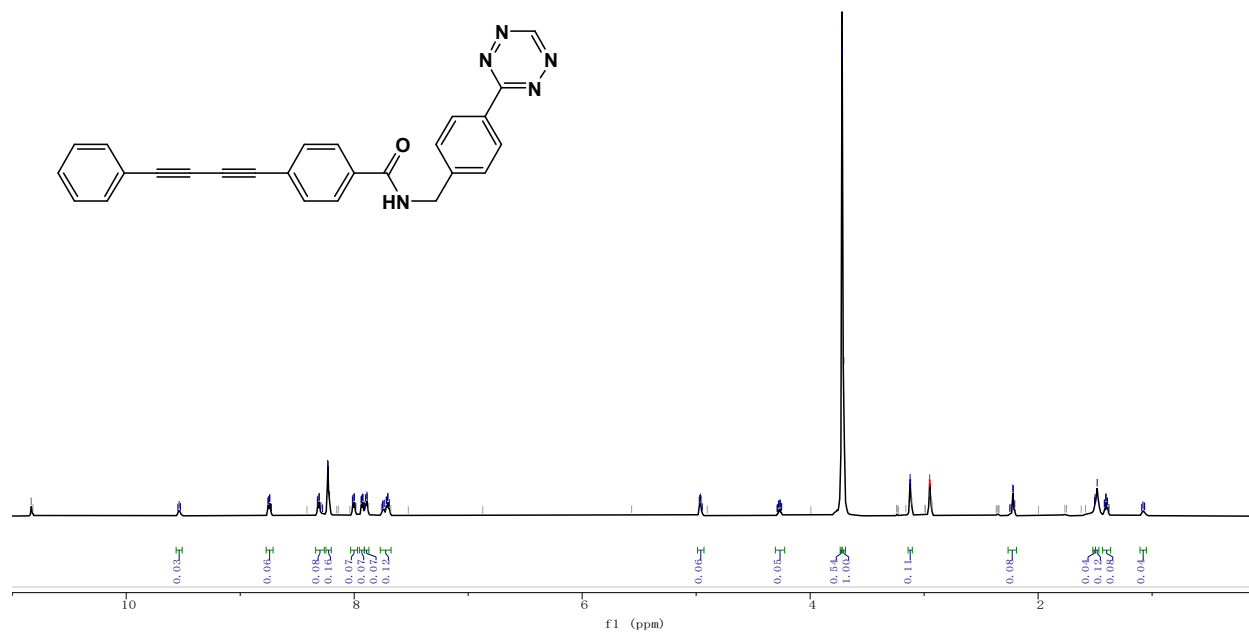

Supplementary Fig. 1. <sup>1</sup>H NMR spectrum of 1.

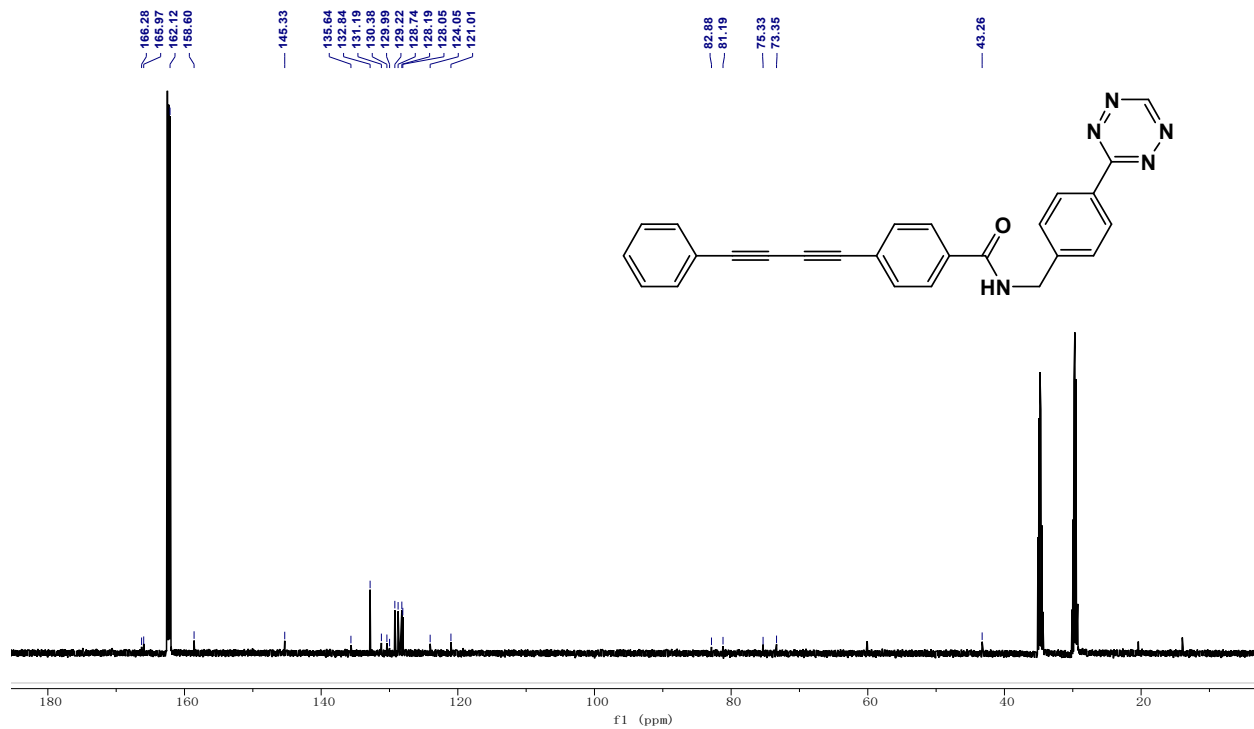

Supplementary Fig. 2. <sup>13</sup>C NMR spectrum of 1.

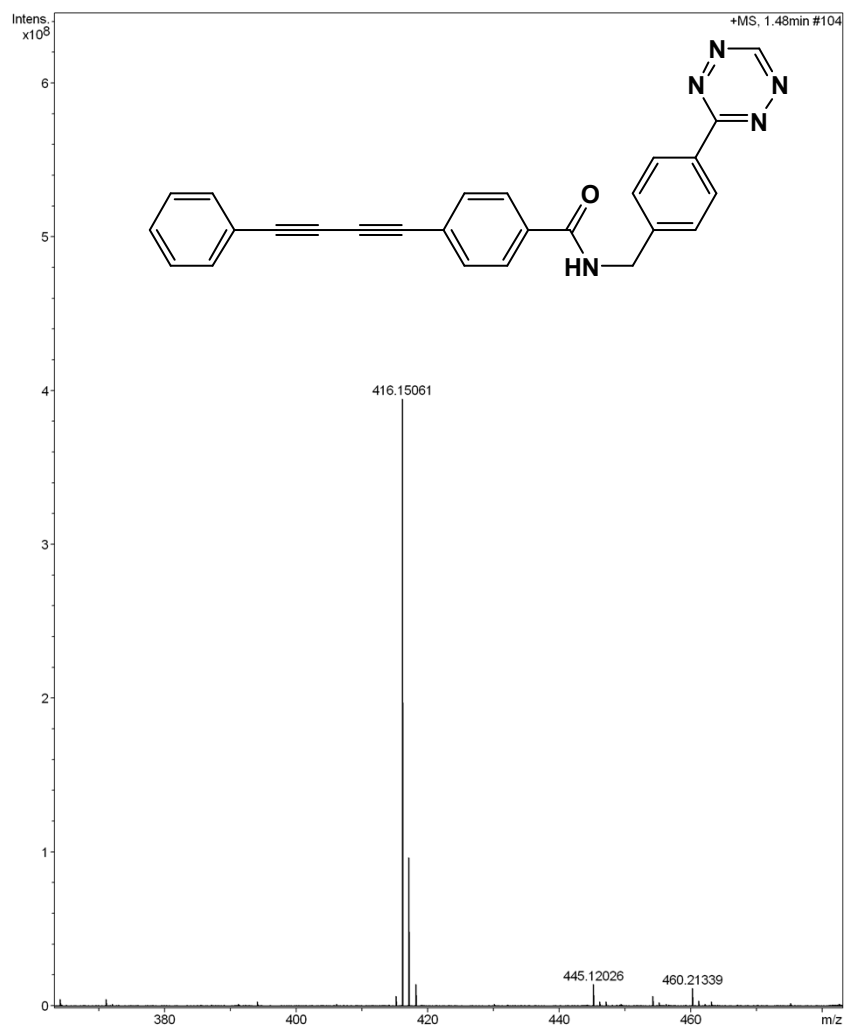

Supplementary Fig. 3. FT-MS spectrum of 1.

**Supplementary Figure 4.** A schematic illustration of the instrumental setup of the SRS imaging system. DM: dichroic mirror; GM: galvanometer; EOM: electro-optic modulator; PD: photodiode; F: optical filters.

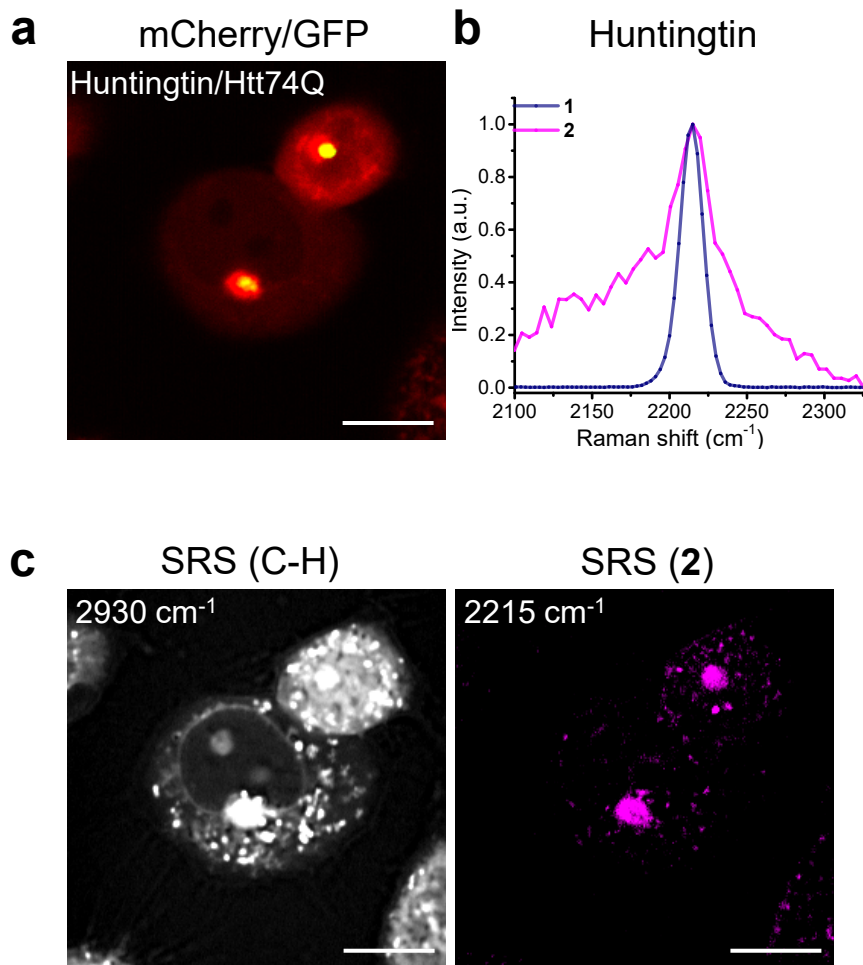

**Supplementary Figure 5.** Supplementary images of targeted Huntingtin proteins. **a.** The merged TPEF image of mCherry and EGFP (yellow). **b.** SRS spectra of Raman tag **2** targeted to Huntingtin proteins. Pure compound of **1** is shown as reference. **c.** SRS imaging of CH vibrations ( $2930 \text{ cm}^{-1}$ ) and Raman reporters ( $2215 \text{ cm}^{-1}$ ) targeted Huntingtin proteins in living HeLa cells. Scale bar:  $15 \mu\text{m}$ .

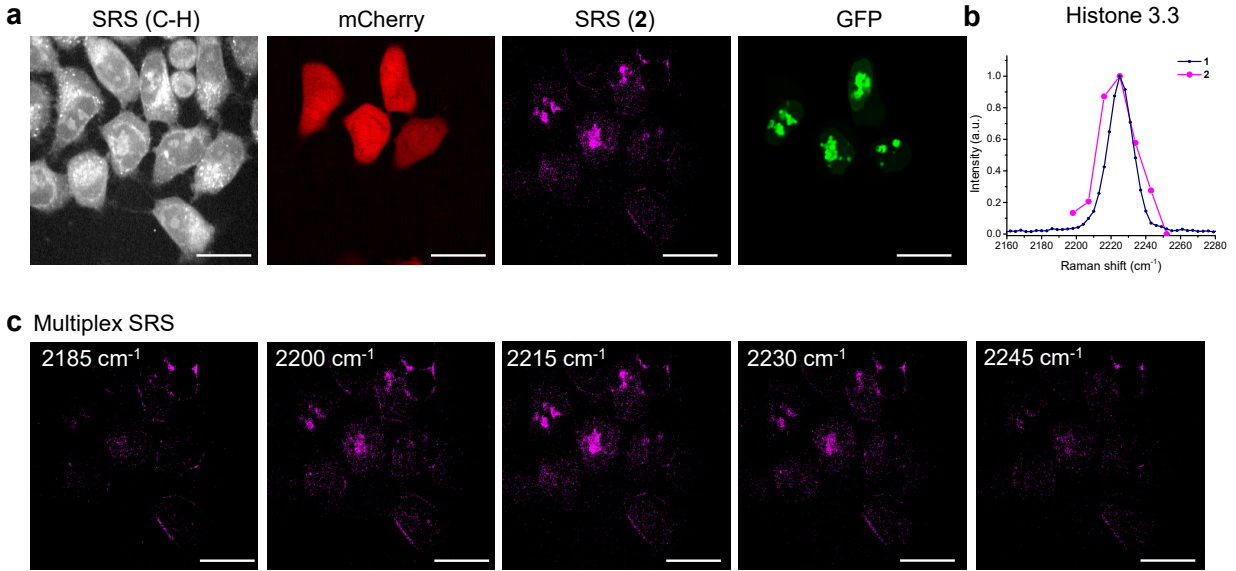

**Supplementary Figure 6.** Multiplex SRS imaging of Histone 3.3 proteins. **a.** SRS and TPEF imaging of Histone 3.3 proteins. **b.** Multiplex SRS spectra of **2** targeted to Histone 3.3 proteins. **c.** Multiplex SRS image stacks, which show the Raman reporters in EGFP-Histone 3.3 in HeLa cells. Scale bar: 15  $\mu$ m.
