# Supplementary material for: Imaging specific proteins in living cells with small unnatural amino acid attached Raman reporters
Source: Royal Society of Chemistry journal article supplement (doi:10.1039/d4an00758a), 2024-01-01
Supplement: d4an00758a2.pdf [file d4an00758a2.pdf]

1 ***Supporting Information***

2 **Imaging Specific Proteins in Living Cells with Small**  
3 **Unnatural Amino Acid Attached Raman Reporters**

4 Erli Cai<sup>1#</sup>, Yage Chen<sup>1#</sup>, Jing Zhang<sup>2#</sup>, Haozheng Li<sup>4</sup>, Yiran Li<sup>1,4</sup>, Shuai Yan<sup>4</sup>,

5 Zhiyong He<sup>3\*</sup>, Quan Yuan<sup>3\*</sup> and Ping Wang<sup>1,4,5\*</sup>

6 <sup>1</sup> *Britton Chance Center and MoE Key Laboratory for Biomedical Photonics, Wuhan*

7 *National Laboratory for Optoelectronics-Huazhong University of Science and*

8 *Technology, Wuhan, Hubei 430074, China*

9 <sup>2</sup> *Department of Biochemistry and Molecular Biology, School of Basic Medicine,*

10 *Tongji Medical College and State Key Laboratory for Diagnosis and Treatment of*

11 *Severe Zoonotic Infectious Diseases, Huazhong University of Science and Technology*

12 <sup>3</sup> *College of Chemistry and Molecular Sciences, Key Laboratory of Biomedical*

13 *Polymers of the Ministry of Education, Wuhan University, Wuhan, Hubei 430072,*

14 *China*

15 <sup>4</sup> *Changping Laboratory, Beijing 102206, China*

16 <sup>5</sup> *Huaiyin Institute of Technology, Huaian, Jiangsu 223003, China*

17  
18  
19 *#These authors contributed equally*

20 *\*Corresponding author: p\_wang@hust.edu.cn*

21 *yuanquan@whu.edu.cn*

22 *hezy@whu.edu.cn*

## 23 Methods

24 **Reagents:** BCNK and 2'-aTCOK were purchased from Sirius Fine Chemicals SiChem GmbH. N-  
25 (4-(1,2,4,5-tetrazin-3-yl)benzyl)-4-(phenylbuta-1,3-diyne-1-yl)benzamide (**1**) shown in **Fig. 1a** was  
26 home made. Phosphate Buffered Saline (PBS, pH 7.4; Gibco, 8117069), dulbecco's modified  
27 eagle's medium (DMEM; Gibco, 8117156) and fetal bovine serum (FBS; Gibco, 10270) were  
28 purchased from Thermo Fisher Scientific, Inc.

29

### 30 (1) Synthesis of Lyso-BADY

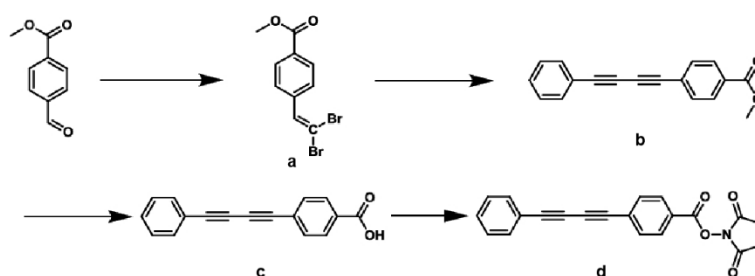

31

32 **Scheme S1.** Synthesis of Lyso-BADY. Reagents and conditions: (a) CBr<sub>4</sub>, Ph<sub>3</sub>P, DCM. (b)  
33 Ethynylbenzene, Ph<sub>3</sub>P, Tris(dibenzylideneacetone)dipalladium, Et<sub>3</sub>N, DMF. (c) NaOH, H<sub>2</sub>O, THF,  
34 MeOH. (d) DSC, DMAP, CH<sub>3</sub>CN.

### 35 Synthesis of methyl 4-(2,2-dibromovinyl) benzoate (a)

36 To a cooled solution (0 °C) of carbon tetrabromide (9.83 g, 30 mmol) in DCM (50 mL),  
37 triphenylphosphine (15.73 g, 60 mmol) was added slowly. After stirring for 20 minutes at 0 °C,  
38 methyl 4-formylbenzoate (4.92 g, 30 mmol) in DCM (50 mL) was added in slowly. The mixture  
39 was stirred at room temperature for 90 minutes. Then the mixture was poured into ethyl acetate (600  
40 mL), and washed with brine (3 × 300 mL). The organic layer was dried over anhydrous Na<sub>2</sub>SO<sub>4</sub>.  
41 After concentration in vacuo, the residue was purified by silica gel column chromatography, eluting  
42 with PE: EA (20:1) to give **a** as a white solid (8 g, 25.2 mmol, yield 84 %). <sup>1</sup>H NMR (400 MHz,  
43 CDCl<sub>3</sub>) δ 8.02 (d, J = 8.4 Hz, 2H), 7.59 (d, J = 8.3 Hz, 2H), 7.51 (s, 1H), 3.92 (s, 3H); <sup>13</sup>C NMR  
44 (101 MHz, CDCl<sub>3</sub>) δ 166.55, 139.57, 136.04, 129.84, 129.68, 128.35, 91.99, 52.29. ESI-MS Calcd.  
45 for C<sub>10</sub>H<sub>9</sub>Br<sub>2</sub>O<sub>2</sub> [M+H]<sup>+</sup>: 318.9, found: 318.9.

### 46 Synthesis of methyl 4-(phenylbuta-1,3-diyne-1-yl) benzoate (b)

47 To a solution of methyl 4-(2,2-dibromovinyl)benzoate (**a**) (6.4 g, 20.19 mmol), phenylacetylene  
48 (3.1 g, 30.29 mmol), triphenylphosphine (212 mg, 0.81 mmol) and TEA (8.3 mL, 60.57 mmol) in  
49 dry DMF (30 mL), tris(dibenzylideneacetone)dipalladium (180 mg, 0.2 mmol) in dry DMF (4 mL)  
50 was added. The whole mixture was stirred at 85 °C for 4 hours under argon atmosphere. The reaction  
51 mixture was then cooled to r.t. and diluted with Ethyl Acetate: Petroleum Ether (1:1) (600 mL). The  
52 organic layer was washed with 1M hydrochloric acid (2 × 100 mL), 1 M sodium hydroxide (2 × 100  
53 mL), water (2 × 100 mL) and brine (2 × 100 mL), subsequently. After drying over anhydrous

54 Na<sub>2</sub>SO<sub>4</sub>, the organic layer was concentrated in vacuo, and the residue was purified by silica gel  
55 column chromatography, eluting with PE:EA(25:1) to give **b** as a light yellow solid (3.65 g, 14  
56 mmol, yield 69.5 %). <sup>1</sup>H NMR (400 MHz, CDCl<sub>3</sub>) δ 8.01 (d, *J* = 8.4 Hz, 2H), 7.58 (d, *J* = 8.4 Hz,  
57 2H), 7.54 (dt, *J* = 3.6, 2.1 Hz, 2H), 7.42 – 7.32 (m, 3H), 3.92 (s, 3H); <sup>13</sup>C NMR (101 MHz, CDCl<sub>3</sub>)  
58 δ 166.36, 132.61, 132.42, 130.27, 129.57, 129.54, 128.53, 126.50, 121.45, 83.05, 80.49, 77.26,  
59 73.58, 52.38. ESI-MS Calcd. for C<sub>18</sub>H<sub>13</sub>O<sub>2</sub> [M+H]<sup>+</sup>: 261.1, found: 261.1.

#### 60 Synthesis of 4-(phenylbuta-1, 3-diyn-1-yl) benzoic acid (**c**)

61 To a solution of methyl 4-(phenylbuta-1, 3-diyn-1-yl) benzoate (**c**) (782 mg, 3.0 mmol) in THF (10  
62 mL) and MeOH (10 mL), sodium hydroxide (240 mg, 6.0 mmol) in H<sub>2</sub>O (10 mL) was added. The  
63 reaction mixture was stirred for 1 hour at room temperature. The mixture was then poured into water  
64 (100 mL) and pH of the solution was adjusted below **c** with HCl aqueous solution. The acidic  
65 solution was extracted with ethyl acetate (3 × 60 mL). The combined organic layer was dried over  
66 Na<sub>2</sub>SO<sub>4</sub> and concentrated in vacuo to give **c** as a light yellow solid (676 mg, 2.75 mmol, yield 92  
67 %). <sup>1</sup>H NMR (400 MHz, DMSO-d<sub>6</sub>) δ 13.31 (br, 1H), 7.97 (d, *J* = 8.4 Hz, 2H), 7.73 (d, *J* = 8.4 Hz,  
68 2H), 7.66 – 7.62 (m, 2H), 7.54 – 7.43 (m, 3H); <sup>13</sup>C NMR (101 MHz, DMSO-d<sub>6</sub>) δ 166.99, 133.08,  
69 132.99, 132.12, 130.75, 130.05, 129.45, 125.13, 120.59, 83.55, 81.35, 76.26, 73.66. HR-ESI-MS  
70 Calcd. for C<sub>17</sub>H<sub>9</sub>O<sub>2</sub> [M-H]<sup>-</sup>: 245.0608, found: 245.0608.

#### 71 Synthesis of 2, 5-dioxopyrrolidin-1-yl 4-(phenylbuta-1, 3-diyn-1-yl) benzoate (**d**)

72 To a solution of 4-(phenylbuta-1, 3-diyn-1-yl) benzoic acid (**c**) (1 g, 4.05 mmol) in MeCN (30 mL),  
73 DSC (1.56 g, 6.09 mmol) and DMAP (200 mg, 1.63 mmol) was added. The reaction mixture was  
74 stirred for 10 hours at room temperature and diluted with 200 mL EA after the reaction was over.  
75 The mixture was then washed with 1% Sodium bisulfite solution (100 mL ×3) and brine (100 mL  
76 ×3) subsequently. After drying over anhydrous Na<sub>2</sub>SO<sub>4</sub>, the organic layer was concentrated in  
77 vacuo, and the residue was purified by silica gel column chromatography, eluting with DCM:MeOH  
78 (500:1) to give **d** as a light yellow solid (1.3 g, 3.8 mmol, yield 95 %). <sup>1</sup>H NMR (400 MHz, DMSO-  
79 d<sub>6</sub>) δ 8.13 (d, *J* = 8.1 Hz, 2 H), 7.87 (d, *J* = 8.1 Hz, 2H), 7.65 (d, *J* = 7.2 Hz, 2H), 7.55-7.43 (m, 3H),  
80 2.91 (s, 4H); <sup>13</sup>C NMR (101 MHz, DMSO-d<sub>6</sub>) δ 170.71, 161.61, 133.80, 133.06, 130.92, 130.75,  
81 129.47, 127.87, 125.39, 120.39, 84.49, 80.68, 77.89, 73.46, 26.03. ESI-MS Calcd. for C<sub>21</sub>H<sub>14</sub>NO<sub>4</sub>  
82 [M+H]<sup>+</sup>: 344.1, found: 344.1.

#### 83 (2) Synthesis of compound 1: N-(4-(1,2,4,5-tetrazin-3-yl)benzyl)-4-(phenylbuta-1,3-diyn-1-yl) 84 benzamide

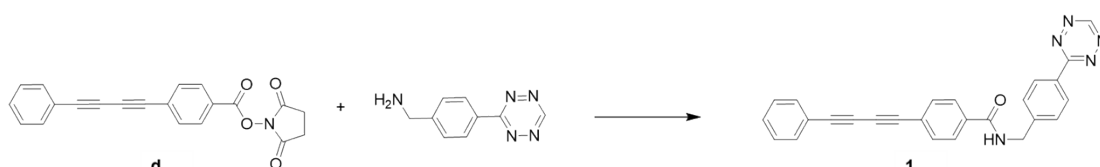

85

86 **Scheme S2.** Synthesis of compound 1. Reagents and conditions: 2, 5-dioxopyrrolidin-1-yl 4-  
87 (phenylbuta-1, 3-diyn-1-yl) benzoate, DMF, tetrazine-amine, N,N-Diisopropylethylamine.

88 To a solution of 2, 5-dioxopyrrolidin-1-yl 4-(phenylbuta-1, 3-diyn-1-yl) benzoate[1] (500 mg, 1.46  
89 mmol) in DMF (10 ml), tetrazine-amine (300 mg, 1.60 mmol) and N,N-Diisopropylethylamine

90 (1.01 ml, 5.83 mmol) was added. The reaction mixture was stirred for 2 hours at room temperature.  
91 After removing solvent *in vacuo*, the residue was purified by silica gel column chromatography,  
92 eluting with DCM:Methanol (10 :1) to give **1** as a light pink solid (551 mg, 1.33 mmol, yield 91%).  
93 <sup>1</sup>H NMR (600 MHz, DMF-*d*<sub>7</sub>) δ 9.54 (t, *J* = 6.9 Hz, 1H), 8.75 (dd, *J* = 7.9, 2.6 Hz, 2H), 8.31 (dt, *J*  
94 = 10.7, 5.4 Hz, 2H), 8.25 – 8.20 (m, 4H), 8.01 (dd, *J* = 8.0, 2.5 Hz, 2H), 7.93 (dd, *J* = 8.0, 2.5 Hz,  
95 2H), 7.89 (t, *J* = 4.7 Hz, 2H), 7.77 – 7.68 (m, 3H), 4.96 (dt, *J* = 9.6, 4.6 Hz, 2H), 4.27 (qt, *J* = 9.6,  
96 4.8 Hz, 1H), 3.72 (s, 14H), 3.71 (d, *J* = 7.2 Hz, 26H), 3.14 – 3.10 (m, 3H), 2.26 – 2.19 (m, 2H), 1.52  
97 – 1.50 (m, 1H), 1.48 (s, 3H), 1.41 (td, *J* = 7.2, 2.7 Hz, 2H), 1.11 – 1.05 (m, 1H). <sup>13</sup>C NMR (151  
98 MHz, DMF-*d*<sub>7</sub>) δ 165.99, 162.13, 158.61, 145.35, 135.66, 132.85, 131.20, 130.39, 129.23, 128.75,  
99 128.20, 128.06, 124.06, 121.02, 82.88, 81.19, 75.33, 73.36, 60.09, 43.27, 34.40, 20.41, 13.85. HR-  
100 ESI-MS Calcd. for C<sub>26</sub>H<sub>18</sub>N<sub>5</sub>O [M+H]<sup>+</sup> : 416.1506, found: 416.1506

101 [1] C. Ding, Y. G. Chen, H. Z. Li, B. Y. Wang, Q. Wei, H. J. Tang, S. K. Jia, Z. Y. He, P. Wang, X.  
102 Zhou, *Chinese Chem Lett* **2019**, *30*, 1393-1396.

103

104 **Plasmids construction:** MmPylRS-AF (Y306A, Y384F double mutant of wild-type PylRS) was  
105 synthesized by Wuhan Tianyi Huiyuan Biotechnology Co., Ltd. and further cloned into the pCMV-  
106 FLAG-IRES2-mCherry plasmid with XbaI and BamHI. 4×U6-PlyT/Htt74Q-EGFP-N150TAG  
107 plasmid was constructed in our laboratory previously. EGFP-N150TAG-Histone 3.3 plasmid was  
108 cloned into the pCMV-Htt74Q-EGFP-N150TAG-6×His plasmid with BsrGI and BamHI in place  
109 of Htt74Q-EGFP-N150TAG. Vimentin fragment was also cloned with XbaI and MfeI to replace the  
110 Htt74Q fragment. TAG codons were introduced into the Htt74Q plasmid at N-terminal and  
111 Vimentin plasmid at N116 position by site-directed mutagenesis. 4×U6-PlyT/TAG-Htt74Q, 4×U6-  
112 PlyT/Histone 3.3-K64TAG and 4×U6-PlyT/Vimentin-N116TAG were generated by introducing the  
113 TAG-Htt74Q, Histone 3.3-K64TAG and Vimentin-N116TAG plasmids into the pCMV-EGFP-  
114 3×HA plasmid, respectively. Site-directed mutagenesis was performed with QuikChange II Site-  
115 Directed Mutagenesis Kit with primers designed on the website <http://bioinformatics.org/primerx/>.

116 **Mammalian cell culture and transfection:** HeLa cells were cultured at 37 °C in a 5% CO<sub>2</sub>  
117 atmosphere in DMEM supplemented with 10% (v/v) FBS, and were subcultured every 3-4 days.  
118 Neofect™ DNA transfection reagent (Neofect™ biotech Co., Ltd.) was used by 1:1 (Neofect™:  
119 total amount of DNA) for transient transfection, following the manufacturer's protocol. Cells were  
120 transfected in the cell culture dishes (glass bottom φ20 mm, Cellvis) at a density of 5 × 10<sup>4</sup> per well  
121 with the Mm-PylRS-AF/Pyl-tRNA<sub>CUA</sub> plasmid (0.5 μg) and the plasmid of interest (0.5 μg).  
122 Transfection of both plasmids was performed using equal amount. The medium was replaced by  
123 fresh medium, when necessary, after overnight incubation with BCNK or 2'-aTCOK (1 mM). Cells  
124 were used for experiments at least 24 h after transfection. Compound **1** (5 μM) was added for  
125 incubation 30 minutes at 37 °C before imaging.

126 **Multiplex stimulated Raman scattering microscope:** The dual-output femtosecond laser  
127 (InSight DeepSee, Spectra-Physics) provided both pump (680–1300 nm, ~120 fs) and Stokes (1040  
128 nm, ~220 fs) laser beams with a repetition rate of 80 MHz. The Stokes beam was modulated by a  
129 resonant electro-optical modulator (EO-AM-RC2, Thorlabs) at 10.55 MHz with about 95%  
130 modulation depth. The temporal overlap between pump and Stokes pulse trains was ensured with a

131 time delay line. The pump beam was spatially overlapped with Stokes beam by a dichroic mirror  
132 (DMSP1000L, Thorlabs). Pump and Stokes pulses were linearly chirped to ~3 ps by 64 cm long  
133 SF57 glass rod. The multiplex SRS image stacks were obtained by scanning the relative time delay  
134 between pump and Stokes pulses. Then the two laser beams were guided into a laser scanning  
135 microscope equipped with a two-axis galvanometer (GVS002, Thorlabs). A ×60 water immersion  
136 objective (N.A. 1.1, LUMFLN 60XW, Olympus) was used for all cell imaging, and the transmitted  
137 pump beam was collected with a 1.4 N.A. oil condenser and detected by a large area Si photodiode  
138 (S3994-01, Hamamatsu). Two short-pass filters (ET980SP, Chroma) were installed in front of the  
139 photodiode to completely block the Stokes beam. The SRS signal from PD was amplified by a home  
140 built 10.5MHz resonant amplifier and demodulated by a digital lock-in amplifier (LIA, HF2LI,  
141 Zurich Instrument). Two optical filters were equipped for two photon excited imaging of mCherry  
142 (FF02-641/75-25, Semrock) and EGFP (ET525/70m, Chroma), respectively. The integration time  
143 for a pixel of 250 nm × 250 nm was 10 μs, the typical acquisition time for each frame with an field  
144 of view of 100 μm × 100 μm was around 1.6 s.

145 ***Sample preparation for SRS and TPEF imaging:*** Cells were transfected in a 24-well plate  
146 at a density of  $1 \times 10^5$  per well. After reaching ~80% confluence, cells were added with  
147 BCNK/TCOK (5 mM), and then transfected with Neofect™ DNA transfection reagent with 1 μg of  
148 two plasmids at a ratio of 1:1. After incubation at 37 °C for 36 h, the transfected cells were washed  
149 once with PBS, and cultured with **1** (5 μM) for 30-60 min, and then washed three times over 1h by  
150 fresh complete-cell-growth medium to minimize the background signal during SRS imaging.

151 ***Multiplex stimulated Raman scattering (SRS) microscopy:*** In SRS imaging of cells, the  
152 pixel settings were 300×300 pixels at 2215 cm<sup>-1</sup> and 2930 cm<sup>-1</sup> with a dwell time of 20 μs (**Fig. 2-**  
153 **4**). Images were averaged 20 times to present better contrast. Multiplex SRS images were acquired  
154 at 300×300 pixels with a dwell time of 20 μs (**Fig. 2d, Supplementary Fig. 4c**). For TPEF imaging,  
155 the pixel settings were 300×300 pixels with a dwell time of 20 μs (**Fig. 2b, Fig. 3b, d, Fig. 4b, d,**  
156 **g, Supplementary Fig. 3a, Supplementary Fig. 4a**).

157 ***Spontaneous Raman spectroscopy:*** The spontaneous Raman spectra were acquired by a  
158 confocal Raman microscope (LabRAM HR800, Horiba Jobin Yvon). A 785 nm laser was focused  
159 on the samples with a 50× objective (N.A. 0.55, Olympus). The integration time for spectra  
160 acquisition was about 30 seconds.

161

162

163

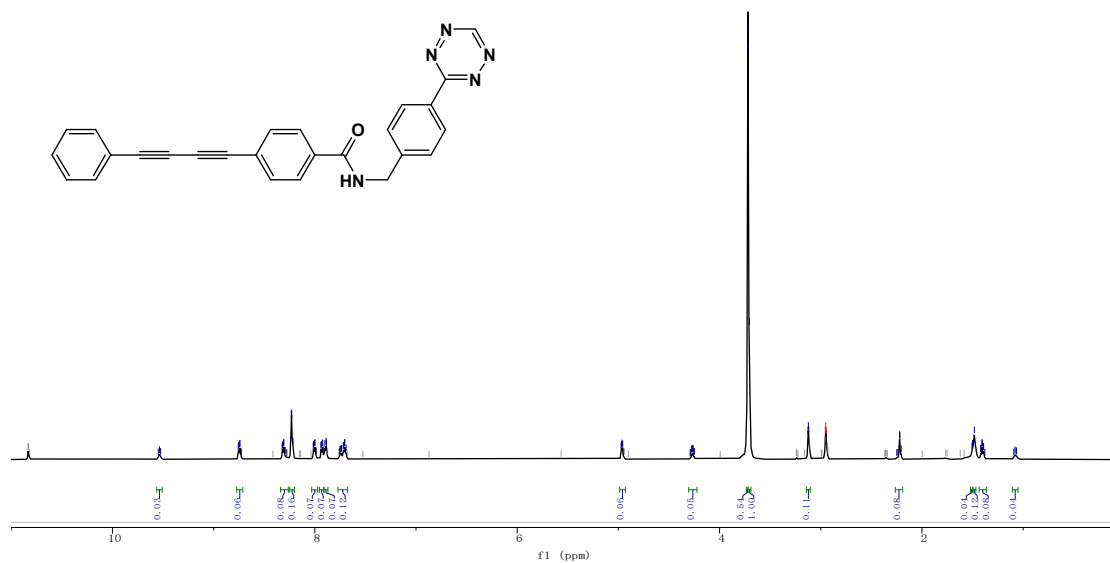

164

165 **Supplementary Fig. 1.**  $^1\text{H}$  NMR spectrum of **1**.

166

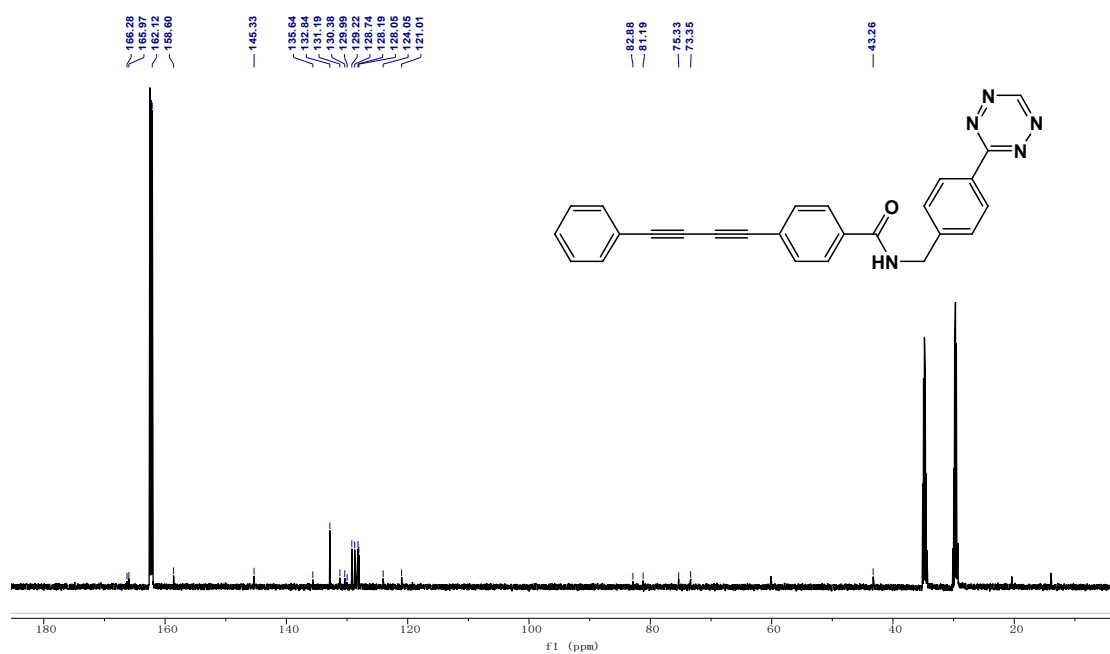

167

168 **Supplementary Fig. 2.**  $^{13}\text{C}$  NMR spectrum of **1**.

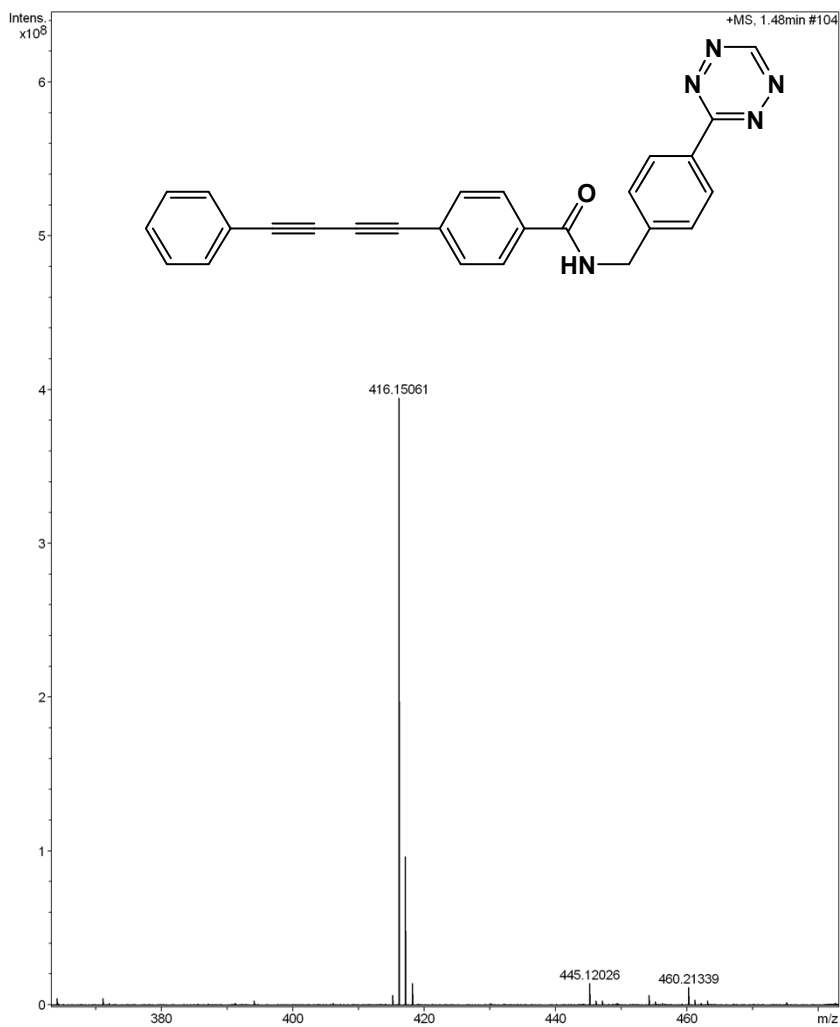

169

170 **Supplementary Fig. 3.** FT-MS spectrum of **1**.

171

172

173

174

175

176 **Supplementary Fig. 4.** A schematic illustration of the instrumental setup of the SRS imaging  
177 system. DM: dichroic mirror; GM: galvanometer; EOM: electro-optic modulator; PD: photodiode;  
178 F: optical filters.

179

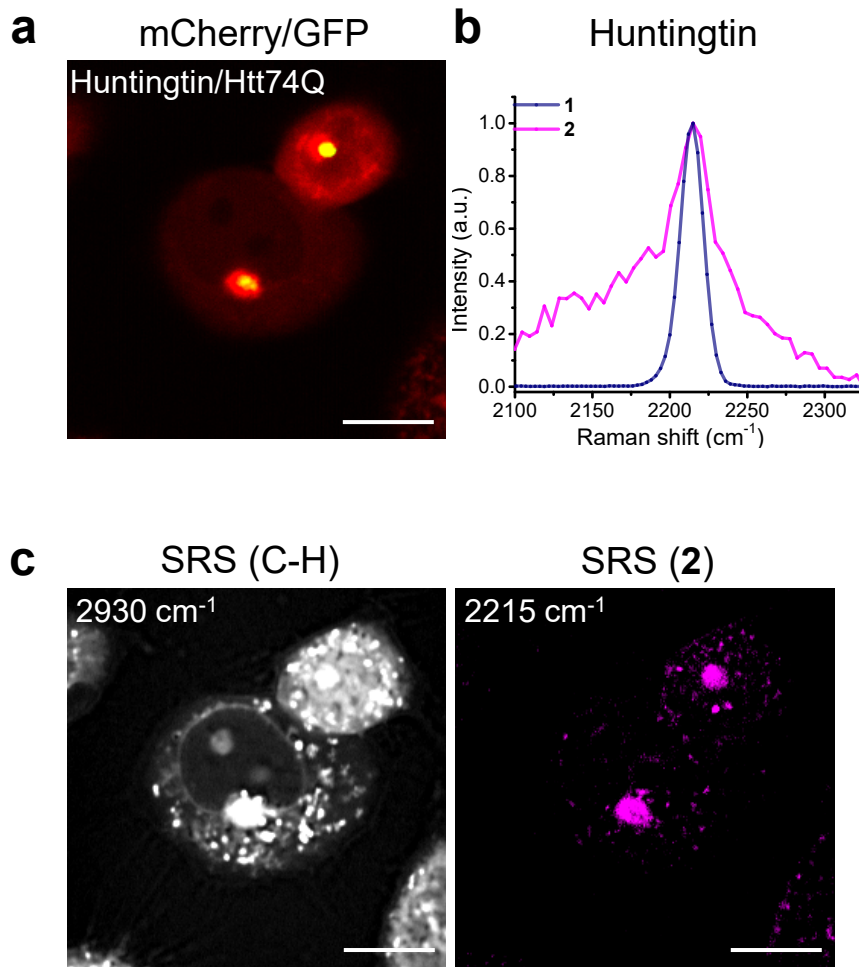

181

182 **Supplementary Fig. 5.** Supplementary images of targeted Huntingtin proteins. **a.** The merged  
 183 TPEF image of mCherry and EGFP (yellow). **b.** SRS spectra of Raman tag **2** targeted to  
 184 Huntingtin proteins. Pure compound of **1** is shown as reference. **c.** SRS imaging of CH  
 185 vibrations ( $2930 \text{ cm}^{-1}$ ) and Raman reporters ( $2215 \text{ cm}^{-1}$ ) targeted Huntingtin proteins in living  
 186 HeLa cells. Scale bar:  $15 \mu\text{m}$ .

187



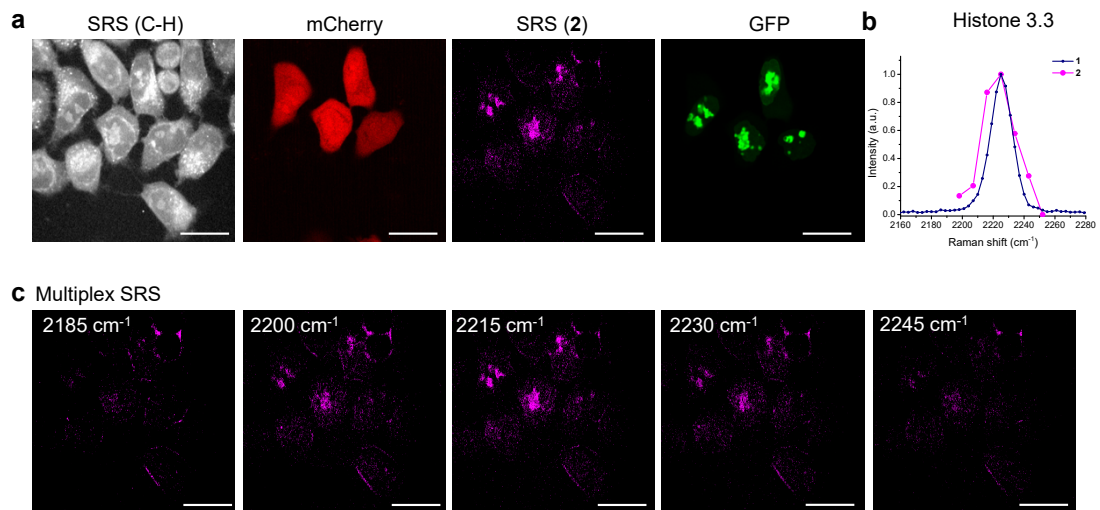

188

189 **Supplementary Fig. 6.** Multiplex SRS imaging of Histone 3.3 proteins. **a.** SRS and TPEF

190 imaging of Histone 3.3 proteins. **b.** Multiplex SRS spectra of **2** targeted to Histone 3.3 proteins.

191 **c.** Multiplex SRS image stacks, which show the Raman reporters in EGFP-Histone 3.3 in HeLa

192 cells. Scale bar: 15  $\mu\text{m}$ .

193

194 Sequences of all plasmids used in our experiments:

195

196 **4×PlyT/MmBCNRS(Flag)-IRES2-mCherry**

197 ctagaggtagaccgttacataacttacggtaaatggcccgctggctgaccgccaacgacccccgccattgacgtcaatagtaacgcaata  
198 gggactttcattgacgtcaatgggtggagatttacggtaaacgcccacttggcagtagatcaagtgtatcatatgccaagtacgccccatt  
199 gacgtcaatgacggtaaatggcccgctggcatttgccagtagatgacctatgggactttcctacttggcagtagatctacgtattagtcac  
200 gctattaccatgatcaggtgagccccacttctgcttactctccccatctcccccccccccccccccaattttgtattatttttttaattatt  
201 tgtgcagcgtatggggggcggggggggggggggggcgcgccaggcggggcgggggcggggcgagggggcggggcggggcggggc  
202 ggagagggtcggcggcagccaatcagagcggcgctccgaaagtctctttatggcgaggcggcggcggcggccataaaaaag  
203 cgaagcgcggcgggggggagtcgctgcagcgtccttcgccccgtccccgctccgcccgcctcgcggcggccgggctc  
204 tgactgaccgcttactcccacaggtgagcggggcggcggccttctcctcgggctgtaattagctgagcaagaggtaagggttaaggg  
205 atggttggttggtgggtattaatgtttaactcctggagcactgcctgaaatcactttttcaggtctagtaggactacaaagacgatgacgat  
206 aaaatggataaaaaaccactaaacactctgatatctgcaaccgggctctggatgtccaggaccggaacaattcataaaaaaacaccacgaa  
207 gtctctgaaagcaaatctatattgaatggcatcggagaccacttgttgaacaactccaggagcagcaggactgcaagagcgtcag  
208 gcaccacaatacaggaagacctgcaaacgctgcagggttcggatgaggatctcaataagttcctcacaaggaacgaagaccagaca  
209 agcgtaaaagcaaggtcgtttctgccccaccagaacgaaaaaggcaatgccaanaatcggttgcgagagccccgaaacctcttgagaatac  
210 agaagcggcacaggctcaacctctggatctaaatttcactgcgataccggttccaccaagagtcagttctgcccggcatctgtttcaac  
211 atcaatatcaagcatttctacaggagcaactgcacccgactggtaaaagggaatacgaatccattacatccatgtctgccccgttcaggca  
212 gtcccccgacttacgaagaccagactgacaggcttgaagtctgttaaacccaaaagatgagatttccctgaattccggcaagccttca  
213 gggagcttgagtcgcaattgctctcgcagaaaaaaagacctgcagcagatctacgaggaaaggaaggaatfatctgggaaactcga  
214 gcgtgaaatfaccaggttctttgtggacaggggtttctgaaataaaatccccgatctgatccctctgagtatacgaaaggatgggcattga  
215 taatgataccgaacttcaaaacagatctcaggggtgacaagaactctgcctgagaccatgcttgcctcaaaccttgccaactacctgcgca  
216 agcttgacagggccctgctgatccaataaaaattttgaataaggccatgctacagaaaagagtcgacggcaaaagaacacctgaaagag  
217 tttaccatgctgaacttctccagatgggatcgggatgcacacgggaaaaatctgaaagcataattacggacttctgcaaccctgggaaatg  
218 attcaagatcgtaggcattctctgatgctctcggggatacccttgatgtaatgcacggagacctggaacttctctgtagtagtcggacc  
219 ataccgttgaccgggaatggggtattgataaacctggataggggacaggttccggctgaacgcttctaaaggttaaacagactttaaaa  
220 atataagagagctgcaaggtccgagcttactataacgggatttctaccaacctgtaaggatcccatcatcaccatcaccattagtaagaccg  
221 cccctcctccccccccctaacgttactggccgaagccgcttgaataaggccggtgctgtttgtctatattttccaccatattgccg  
222 tctttggcaatgtgagggccggaaacctggccctgcttcttgacgagcattcctaggggtctttccccctcgcgcaaaaggaatgcaaggtct  
223 gttgaatgtcgtgaaggaagcagttcctctggaagccttctgaagcaaacacgctctgtagcgacccttgcaggcagcggaaacccccacc  
224 tggcgacaggtcctctcggccaaaagccacgtgtataagatacacctgcaaaaggcggcacaacccagtgccacgttgtgagttggata  
225 gttgtgaaagagtcaaatggctctcctcaagcgtattcaacaaggggctgaaggatccccagaaggtacccattgtatgggatctgatctg  
226 gggcctcgtgacacatgctttacatgttttagtcgaggttaaaaaaacgtctaggccccccgaaccacggggcagctggtttctttgaaaaa  
227 cacgatgataaatggccacaacctggtgagcaagggcagggagataacatggccatcatcaaggagttcatgcttcaaggtgacacat  
228 ggagggctccgtgaacggccacagttcagatcagggcgagggcgagggccgcccctacgagggcaccagaccgccaagctgaa  
229 ggtgaccaaggggtgccccctgcccttcgctgggacatctgtcccctcagttcatgtacggctcgaaggcctacgtgaagcaccgccg  
230 acatccccgactacttgaagctgtcctccccgagggctcaagtgaggcgcgtgatgaacttcgaggacggcggcgtggtgaccgtgacc  
231 caggactcctccctgcaggacggcgagttcatctacaaggtgaagctgcggcgaccaactccccctcgacggccccgtaatgcagaaga  
232 agaccatgggctgggagcctcctcgagcggatgacccgagggcggcgcctgaagggcgagatcaagcagaggctgaagctgaa  
233 ggacggcggcactacgacgctgaggtcaagaccactacaaggccaagaagcccgtgcagctgccccggcctacaacgtcaacatca  
234 agttggacatcacctcccacaacgaggactacacatctggaacagctacgaacgcggcggggcggccactccaccggcgatggac  
235 gagctgtacaagtaaccggaatcctagagctcgtgatcagcctcactgtccttctagttgccagccatctgtgtttccccctccccgtgc  
236 ctctctgacctggaaggtgccactcccactgtccttctataaaaaatgaggaattgcatcgcattgtctgagtaggtgtcattctattctggg  
237 ggggtgggtggggcaggacagcaagggggaggattgggaagagaatagcaggcatgctggggagcggccgaggaacccctagtgat

238 ggagttggccactccctctctgcgcgctcgtcgtcactgaggccggcgaccaaaaggctgcccgacccgggctttgccggggc  
239 ctcagtgagcgagcgagcgcgagctgctgcagggcgccgtgatgaggatatttctccttacgcatctgtgcggatattcacaccgcatacgt  
240 caaagcaaccatagfacgcgcctgtagcggcgcaatgaagcggcggggtgtggtggttacgcgcagcgtgaccgctacacttgcacgcg  
241 ccctagcgcggctccttctcgtttctccttctccttctccttctcggccagctcggcgcttcccgctcaagctctaaaatcgggggctccctttagggctc  
242 cgatttagtgctttacggcacctcgacccccaaaaactgattgggtgatgggttcacgtagtggccatcgccctgatagacggttttcgcct  
243 ttgacgttgagtgccacgttcttaaataggactctgttccaaactggaacaacactcaaccctatctcgggctattcttttgattataagggattt  
244 tggcatttggcctattggttaaaaaatgagctgatttaacaaaaatftaacggaatttaacaaaataftaacgtttacaattttatggtgactct  
245 cagtacaatctgctctgatgccgcatagftaagccagccccgacaccgccaacaccgctgacgcgcctgacgggcttctgctcccgg  
246 catccgcttacagacaagctgtgaccgtctccgggagctgcatgtgtagagggtttaccgctacaccgaaacgcgcgagacgaaagggc  
247 ctgctgatacgcctattttataggttaatgctatgataataatggttcttagacgtcaggtggcacttttcggggaaatgtgcgcggaaccctat  
248 ttgtttatttttaataacattcaaatatgtatccgctcatgagacaataaccctgataaatgctcaataatattgaaaaaggaagagtatgagtatt  
249 caacattccgtgtcggccttattccctttttgcggcattttgcttctctgtttttgctcaccagaaacgctgggtaaaagatgctgaagat  
250 cagttgggtgcacgagtggtttacatcgaactggatctcaacagcggtaagatcttgagagtttcgccccgaagaacgtttccaatgatga  
251 gcactttaaagtctgctatgtggcgggtattatccgctattgacggcggaagagcaactggcgcgcatacactattctcagaatgac  
252 ttggtgagtactaccagtcacagaaaagcattctacggatggcatgacagtaagagaattatgcagtgctgcataacatgagtataaca  
253 ctggcgcaacttactctgacaacgacgcggaggaccgaaggagctaaccgctttttgcacaacatgggggatcatgtaactgccttgcg  
254 ttgggaaccggagctgatgaagccataccaaacgacgagcgtgacaccacgatgcctgtagcaatggcaacaacgttgcgcaactatta  
255 actggcgaactacttactctgacttcccggcaacaataatagactggatggaggcggataaagtgcaggaccacttctgcgctcggccttc  
256 cggctggctggtttattgctgataaatctggagccggtagcgtggaagccgggtatcattgcagcactggggccagatggtgaagccctcc  
257 cgtatcgtatcttacacgacggggagtcaggcaactatggatgaacgaaatagacagatcgtgagataggtgctcactgattaagcatt  
258 ggtaactgtcagaccaagtttactcatatatactttagattgatttaaaactcatttttaaaaggatctaggtgaagatcctttttgataatctca  
259 tgacaaaatcccctaactgtgagtttctcactgagcgtcagaccctgagaaaagatcaaaggatcttctgagatcctttttctgcgct  
260 aatctgctgttgcacaacaaaaaacaccgctaccagcgggtggtttgttggcggatcaagagctaccaactcttttccgaaggttaactggct  
261 tcagcagagcgagataccaaactgtccttctagtgtagccgtagttagccaccactcaagaactctgtagaccgctacatacctcgtct  
262 ctgctaactctgttaccagtggtgctgcccagtggcgataagctgctgttaccgggttgactcaagacgatattaccggataagggcgcagc  
263 ggtcgggctgaacgggggggtcgtgcacacagcccagcttggagcgaacgacctacaccgaaactgagatacctacagcgtgagctatgag  
264 aaagcggcagcttcccgaaggagaaagggcggacaggtatccggtgaagcggcagggtcggaaacagagagcgcacgaggagcttc  
265 cagggggaaacgcctggtatcttatagtcctgctgggttccaccctctgacttgcgctgattttgtgatgctcgcagggggggcggagc  
266 ctatggaaaacgccagcaacggccttttacggcttctggtcttggcctttgctcactggtctgctaccccaccggctcggacta  
267 gccttatttaacttctatttctagctctaaaaacaaaaatggcggaacccccgggaatctaaccggctgaacggatttagagtcattcgtac  
268 tacatgatcaggttccgggtttctccttccacaagatataaaagccaagaatacgaatacttcaagttacggtaagcatatgatagcca  
269 ttttaaacataatttaaaactgcaaaactaccaagaaattacttctacgtcacgtattttgactaataatcttgtttacagtcacaataattcc  
270 aattatctctaacagccttgcctatgcaaatatgaaggatcatgggaaataggccctcacatgtgagcactagccggactagccttat  
271 ttaacttgcatttctagctctaaaacaaaaatggcggaacccccgggaatctaaccggctgaacggatttagagtcattcgtactacatga  
272 tcaggttcccgggtttctccttccacaagatataaaagccaagaatacgaatacttcaagttacggtaagcatatgatagtcatttfaaaa  
273 cataattttaaaactgcaaaactaccaagaaattacttctacgtcacgtattttgactaataatcttgtttacagtcacaataattccaattatct  
274 cttaacagccttgcctatgcaaatatgaaggatcatgggaaataggccctcacatgtgagcctcgagcattgattattggaattgcttc  
275 gctaccaccggctggactagccttatttaacttctatttctagctctaaaacaaaaatggcggaacccccgggaatctaaccggctgaa  
276 cggatttagatcattcgtatcatgatcaggttccgggttctccttccacaagatataaaagccaagaatacgaatacttcaagfta  
277 cggtaagcatatgatagtcattttaaaacataatttaaaactgcaaaactaccaagaaattacttctacgtcacgtattttgactaataatcttt  
278 gtgtttacagtcacaataattccaattctcttaacagccttgccttctgctatgcaaatatgaaggatcatgggaaataggccctcacatgtgag  
279 cactagccggactagccttatttaacttctatttctagctctaaaacaaaaatggcggaacccccgggaatctaaccggctgaacggattt  
280 agagtcattcgtactacatgatcaggttccgggttctccttccacaagatataaaagccaagaatacgaatacttcaagttacggtaa  
281 gcatatgatagtcattttaaaacataattttaaaactgcaaaactaccaagaaattacttctacgtcacgtattttgactaataatctttgtttta



326 gagccggtgagcgtggaagccgcggtatcattgcagcactggggccagatggtaagccctcccgtatcgtatctacacgacggggag  
327 tcaggcaactatggatgaacgaaatagacagatcgctgagataggtgcctcactgattaagcattggaactgtcagaccaagttactcatata  
328 tactttagattgattfaaaactcatttttaattfaaaaggatctaggtgaagatccttttgataatctcatgacaaaatccctaacgtgagtttcgtt  
329 ccaactgagcgtcagaccccgtagaaaagatcaaagatcttctgagatcctttttctgcgcgtaactctgctgctgcaaacaaaaaacac  
330 cgctaccagcgggtggtttgttccggatcaagagctaccaactctttccgaagtaactggcttcagcagagcgcagataccaaactgtc  
331 cttctagtgtagccgtagtttagccaccactcaagaactctgtagcaccgcctacatacctcgtctgtaactctgttaccagtggtcgtgcc  
332 agtggcgataagctgtcttaccgggttgactcaagacgatagttaccggataaggcgcagcggctgggctgaacggggggtcgtgca  
333 cacagcccagcttgagcgaacgacctacaccgaactgagatacctacagcgtgagctatgagaagcggcacgctcccgaaggagaa  
334 aggcggacaggtatccggtaagcggcagggtcggaaacaggagcgcacgagggagctccaggggaaacgcctggtatctttatagt  
335 cctgtcgggttccacactctgactgagcgtcattttgtgatcctcagggggcggagcctatggaaaaacgccagcaacgcggcc  
336 ttttacggttctgacctttgtgctcctttgtcacaatggctcgtacccccaccggctggactagccttatttaactgtatcttctagctctaaa  
337 acaaaaaatggcggaaaccccgggaatcaaccggctgaacggattagagtcattcgtatcatgatcaggttcccgggtgttcgtccttt  
338 ccacaagatataaagccaagaatcgaaatacttcaagttacggttaagcatatgatagtcatttfaaacataattfaaaactgcaaacac  
339 ccaagaaattactttctacgtcacgtatgttactaataatcttgtttacagcaaaatcaattatctcttaacagcctgtatcgtat  
340 gcaaatatgaaggaatcatgggaaatagccctcacatgtgagcactagccggactagccttatttaactgtatcttagctctaaaacaaa  
341 aatggcggaaaccccgggaatcaaccggctgaacggatttagagtcattcgtatcatgatcaggttcccgggtgttcgtcctttccaca  
342 gatataaagccaagaatcgaaatacttcaagttacggttaagcatatgatagtcatttfaaacataatttfaaaactgcaaacaccaaga  
343 aattacttctacgtcacgtatgttactaataatcttgtgtttacagcaaaatcaattatctcttaacagcctgtatcgtatgcaaa  
344 tgaaggaatcatgggaaatagccctcacatgtgagcctcagcattgattattggaattgctcgtacccccaccggctggactagccttattt  
345 aactgtatcttagctctaaaacaaaaatggcggaaaccccgggaatcaaccggctgaacggatttagagtcattcgtatcatgatc  
346 aggttcccgggtgttcgtcctttccacaagatataaagccaagaatcgaaatacttcaagttacggttaagcatatgatagtcatttfaaac  
347 ataatttfaaaactgcaaacaccaagaaattactttctacgtcacgtatgttactaataatcttgtgtttacagcaaaatcaattatctc  
348 ttaacagcctgtatcgtatgcaaatatgaaggaatcatgggaaatagccctcacatgtgagcactagccggactagccttatttaactg  
349 ctattctagctctaaaacaaaaatggcggaaaccccgggaatcaaccggctgaacggatttagagtcattcgtatcatgatcaggttcc  
350 ccggtgttcgtcctttccacaagatataaagccaagaatcgaaatacttcaagttacggttaagcatatgatagtcatttfaaacataattt  
351 aaaaactgcaaacaccaagaaattacttctacgtcacgtatgttactaataatcttgtgtttacagcaaaatcaattatctcttaaca  
352 gcctgtatcgtatgcaaatatgaaggaatcatgggaaatagccctcacatgtgagcctcagcattgattattga

353

### 354 pCMV-EGFP(N150tag)-Histone3.3

355 ctagggtaccggttacataacttacggtaaatggcccgcctggctgaccgccaacgacccccgccattgacgtcaatagtaacccaata  
356 gggactttcattgacgtcaatgggtggagtatttacggtaaactgccacttggcagtagatcaagtgtatcatatgccaagtagccccctatt  
357 gacgtcaatgacggtaaatggcccgcctggcattgtgccagtagatgacctatgggacttctacttggcagtagatctacgtattagtcac  
358 gctattaccatggtgatgctgggtttggcagtagatcaatggcgtggatagcgggttgactcacggggatttccaagtctccacccattgacgt  
359 caatgggagttgtttggcaccataaacaacgggacttccaaaatgctgaacaactccgccattgacgcaaatgggaggtagggcgtgta  
360 cgggtgggaggtctatataagcagagctctggctaactagagaaccactgcttactggcttatcgaatataacgactcactatagggaga  
361 cccaagctggtagcgtttaaaccggcccttagatctcggcctagctagcgtaccggctgccaccatggtgagcaagggcggaggag  
362 ctgttaccgggggtggtcccatcctggtcagctggacggcagtaaacggccacaagttcagcgtgtccggcgagggcgaggcgat  
363 gccacctacggcaagctgacctgaagttcatctgcaccaccggcaagctgccctggcccaccctgtgaccacctgacctacg  
364 gcgtgagtgcttcagccgctacccgaccatgaagcagcagcacttctcaagtcgccatgccgaaggctacgtccaggagcgcac  
365 catcttctcaaggacgacggcaactacaagaccgcccggaggtgaagttcagggcgacacccctggtgaaccgcatcagctgaaggg  
366 catcacttcaaggagcggcaacatcctgggcacaagctggagtaactacaacagccactaggtctatcatgcccgacaagcag  
367 aagaacggcatcaaggtgaactcaagatcccccacaacatcagggacggcagcgtgcagctcggcaccactaccagcagaaccccc  
368 catcggcgacggccccgtgctgctcccgaacacactacgtgacaccagtcgccctgagcaaaccccaacgagaagcgcgac  
369 acatggtcctgctggagttcgtgaccgccggggtactctcggcatggacgagctgtacacgatggcacgtaccaagcaaacgccc

370 taaatcgaccggaggcaaggcgccccgaagcagctggccaccaaggcgccccgtaaatcggcgccatccaccggcgagtgagaag  
371 ccacatcgtaccgtcctggaacgggtggccctgctgagattcgtcgtaccagaagtcacggagctgctcatccgcaagctgccgtcca  
372 gctgtggtgcgagatagcccagactcaagaccgatcgtcgtccagtcggcgccattggagccctacaggaggccagcgaggc  
373 gtacctgctggtctgttcgaggacaccaatctgtcgtccattcacgccaagcgtcaccattatgccaaggacatccagctggccagac  
374 gcatccgtggcgagcgggctcacggcctcggcgtccaccatggtgagcaagggatccaccggatctagaagcttaagttaccctacga  
375 cgtgcccactacgccgctggagcatacccctacgactgcccactacgccgctggagcatacccctacgactgcccactacgcctaa  
376 ccatcaccatcactaagaattcctagagctcgtgatcagcctcactgtgcttctagtggccagccatctgtgttccccctccccgtcctt  
377 ccttgaccctggaagggtgccactcccactgtcctttcctaataaaatgaggaaattgcatcgcattgtctgagtaggtgtcattctattctggggg  
378 gtggggtggggcaggacagcaagggggaggattgggaagagaatagcaggcatgctggggagcggccgaggaaccctagtgtatgg  
379 agttggccactccctctctcgcgctcgtcgtcactgaggccggcgaccaaaggctgcccagccccgggcttggccggcgccctc  
380 agtgagcagcagcgcgcagctgcctgcagggcgccctgatcgggtattttctcttacgcatctgtcgggtatttcacaccgcatactca  
381 aagcaaccatagtagcgcctgtagcggcgcatgaagcggcggtgtggtgttacgcgcagcgtgaccgctacactgcccagcgc  
382 ctagegcccgtcctttcgttcttcccttcttctcgcaccgttcgccggcttccccgtaagctctaaatcgggggctccctttagggtfccg  
383 atttagtctttacggcacctcgacccccaaaaaactgattgggtgatggttccagtagtggccatgcctgatagacggtttttccctttg  
384 acgttggagtccacgttcttaatagtgactctgttccaaactggaacaactcaaccctatctcgggctattctttgattataaggattttg  
385 ccgatttcggcctattggttaaaaaatgagctgatttaacaaaaatfaacgcgaatttaacaaaaatataacgtttacaattttatggtgactctca  
386 gtacaatctgctctgatccgcatagttaagccagccccgacaccgccaacaccgctgacgcgccctgacgggcttctgtctcccggca  
387 tccgcttacagacaagctgtgaccgtctccgggagctgcatgtgtcagaggtttaccgtcatcaccgaaacgcgcgagacgaaaggcct  
388 cgtgatacgcctattttataggttaatgtcatgataataatggttcttagacgtcaggtggcacttttcggggaaatgtcgcggaaaccctattt  
389 gtttttttctaaatacattcaaatatgtatccgctcatgagacaataaccctgataaatgcttcaataatfgaaaaaggaaagatagattc  
390 aacatttcctgtcgccttattccctttttgcggcattttgccttctgttttctcaccagaaacgctggtgaaagtaaaagatgctgaagatc  
391 agttgggtgacagagtggtttacatcgaactggaatcacaacgcggtgaagatccttgagagtttcgccccgaagaacgtttccaatgatgag  
392 cacttttaagttctgtatgtggcgcggtattatcccgtattgacgccgggcaaggaactcggctgccgcatacactattctcagaatgactt  
393 ggttgagtactaccagtcacagaaaagcatcttacggatggcatgacagtaagagaattatgagtgctgccataacctgatgataaacact  
394 gcgccaactacttctgacaacgatcggaggaccgaaggagctaaccgctttttgcacaacatgggggatcatgtaactcgccttgatcgtt  
395 gggaaccggagctgaatgaagccataccaaacgacgagcgtgacaccacgatcctgtagcaatggcaacaacgttcgcaaacattaaac  
396 tggcgaactacttactctagctcccggcaacaattaatagactggatggaggcgataaagttgcaggaccacttctcgcctcggccttccg  
397 gctggctggtttattgctgataaatctggagccggtgagcgtggaagccgcggtatcattgcagcactggggccagatggttaagccctccgt  
398 atcgtatgtactacagcggggagtcaggcaactatggatgaacgaaatagacagatcgtgagataggtgcctcactgattaagcattggt  
399 aactgtcagaccaagttactcatatatactttagattgatttaaaactcatttttaattaaaaggatctaggtgaagatccttttgataatctatga  
400 ccaaaatcccttaacgtgagtttcttccactgagcgtcagaccctgagaaaagatcaaaaggatcttcttgatcctttttctgcccgtaatc  
401 tgcgtctgcaaacaaaaaaccaccgctaccagcgggtgttgttgcggatcaagagctaccaactctttccgaaggttaactggcttcag  
402 cagagcgcagataccaaactgtccttctagtgtagccgtagtttagccaccacttcaagaactctgtagcaccgcctacatactcgtctgc  
403 taatcctgttaccagtggtcgtgccagtgagcagataagtcgtgtcttaccgggttgactcaagacgatagttaccggataaggcgcagcggtc  
404 gggctgaacggggggtcgtgcacacagcccagcttgagcgaacgacctacaccgaactgagatacctacagcgtgagctatgagaag  
405 cggcacttcccgaaggagaaaaggcggacaggtatccggtaagcggcagggctggaacaggagagcgcacgagggagcttccagg  
406 gggaacgcctggtatcttatagtcctgctgggttccacactcactgagcgtcattttgtgatgctcgtcagggggggcgagcctatg  
407 gaaaaacgccgaacgcggccttttacggttcttgccttttgcctcacttgctcacttggttctgctaccccaccggtcggactagcctta  
408 ttttaactgctatttctagctctaaaaacaaaaatggcggaacccccgggaatcaccggctgaacggatttagagtcattcgtatcatg  
409 atcaggttcccgggttctccttccacaagatataaaagcaagaatcgaatacttcaagttacggtaagcatatgatagtccattttaa  
410 acataattttaaactgcaaacactaccaagaatattactttctacgtcactatttttactaataatcttgttttacagtaaaatattccaattac  
411 tcttaacagccttgatcgtatatacaaatatgaaggaatcatgggaataggccctcatatgtgagcactagccggactagccttatttaactt  
412 gctatttctagctctaaaaacaaaaatggcggaaacccccgggaatcaccggctgaacggatttagagtcattcgtatcatgatcaggtt  
413 cccgggttctcctttccacaagatataaaagcaagaatcgaatacttcaagttacggtaagcatatgatagtccattttaaacataatt

414 ttaaaactgcaaactaccaagaattattactttctacgtcacgtaattttgtactaatactttgtgtttacagtcaaattaattccaattatctcttaac  
415 agccttgatcgtatgcaaatatgaaggaaatcatgggaaataggccctcacatgtgagcctcgagcattgatttgaattgcttcgctacc  
416 caccggctcgactagccttatttaacttgctatttctagctctaaaacaaaaatggcggaaacccgggaatctaaccggctgaacggattt  
417 agagtccattcgatctacatgatcagggtccgggtgttcgctcttcacaagatatataagccaagaatcgaatactttcaagttacggtaa  
418 gcatatgatagtcattttaaacataattttaaactgcaaactaccaagaattattactttctacgtcacgtaattttgtactaatactttgtgtta  
419 cagcaaaattaattccaattatctcttaacagccttgatcgtatgcaaatatgaaggaaatcatgggaaataggccctcacatgtgagcactag  
420 cggactagccttatttaacttgctatttctagctctaaaacaaaaatggcggaaacccgggaatctaaccggctgaacggatttagagtc  
421 cattcgtatctacatgatcagggtccgggtgttcgctcttcacaagatatataagccaagaatcgaatactttcaagttacggtaagcatat  
422 gatagtcattttaaacataattttaaactgcaaactaccaagaattattactttctacgtcacgtaattttgtactaatactttgtgttacagtc  
423 aattaattccaattatctcttaacagccttgatcgtatgcaaatatgaaggaaatcatgggaaataggccctcacatgtgagcctcgagcattg  
424 attattga

425

426 **pCMV-Vimentin-eGFP(N150tag)**

427 cttagaggtaaccgttacataacttacggtaaatggcccgctggctgaccgccaacgacccccgccattgacgtcaatagtaacgccaata  
428 gggactttcattgacgtcaatgggtggagtatttacggtaaactgccacttggcagtcacatcaagtgtatcatatgccaagtacgccccatt  
429 gacgtcaatgacggtaaatggcccgctggcattgtgccagtcacatgaccttatgggactttcctacttggcagtcacatctacgtattagtcac  
430 gctattaccatggtgatgctgggtttggcagtcacatcaatggcgtggatagcgggttgactcacggggattccaagtctccacccattgacgt  
431 caatgggagtttggcaccacaaatcaacgggactttccaaaatgctgtaacaactccgccccattgacgcaaatgggcggtagggcgtgta  
432 cgggtgggaggtctatataagcagagctctctggctaactagagaaccactgcttactggcttatcgaataatacgaactactatagggaga  
433 ccaagtctggctagcgtttaaacgggccccttagactcgaggccaccatgagctccaccaggtccgtctctctcctcctaccgaggatg  
434 tcggcggccccggcaccgcgagccggccgagctccagccggagctacgtgactacgtccaccgcacctacagcctgggcagcgcgct  
435 gcgccccagcaccagccgacgctctacgctctgccccggcggcgtgatgccacgcgctcctctgccgtgcgctgcggagcagcgt  
436 gcccgggtgctgctctcagcagcactcgggtgacttctcgtggccgacgccaacaccgagttcaagaacacccgcaccaacgagaa  
437 ggtggagctgcaggagctgaatgaccgcttcgccaactacatcgacaaggtgctcctctggagcagcagaataagatcctgctggccgag  
438 ctgagcagctcaaggccaaggaagtcgcgctgggggacctctacgaggaggagatgcgggagctgcgcccggcaggtggaccag  
439 ctaaccaacgacaaagcccgcgtcaggtggagcgcgacaacctggccgaggacatcatgcgctccgggagaaatgacgaggagat  
440 gcttcagagagaggaagccgaaaacacctgcaatcttcagacagatggtgacaatgcgtctctggcacgcttgaccttgaacgcaaagt  
441 ggaatcttgcagaagagattgccttttgaagaaactccacgaagaggaatccaggagctgcaggctcagattcaggaacagcatgtcca  
442 aatcgtatggtgattccaagcctgacctcagcgtccctgcgtgacgtacgtcagcaatatgaaagtgtggctccaagaacctgcagga  
443 ggcagaagaatggtacaaatccaagtttgcctcctctgaggtgccaaccggaacaatgacgcccctgcgcccaggcaagcaggagtc  
444 attgagtaccggagacaggtgcagtcctcactgtgaagtggatgcccttaaaggaaaccaatgagtcctggaacgccagatcgctgaaat  
445 ggaagagaacttgccttgaagctgtaactaccaagacactattggccgctgcaggatgagattcagaatgaaggaggaaatggctc  
446 gtcacctctgtaataccaagacctgctcaatgtaagatggcccttgacattgagattgccacctacaggaagctgctggaaggcaggaga  
447 gcaggatttctctgctcttccaaactttctcctgaacctgagggaaactaatctggattcactcctctggtgataccactcaaaaaggac  
448 acttctgattaagacggttgaactagagatggacaggttatcaacgaaacttctcagcatcacgatgacctgaacaattgatggtgagcaag  
449 ggcgaggagctgttaccgggtgtgccccatctgtcagctggacggcgacgtaaacggccacaagttcagcgtgtccggcagggg  
450 cgagggcgatgccacctacggcaagctgacctgaagttcatctgaccaccggcaagctgccctgcccctggcccacctcgtgaccacc  
451 ctgacctacggcgtgcagtctcagccgctaccccgaccacatgaagcagcagcacttctcaagtcgcccattgccgaaaggctacgtcca  
452 ggagcgcaccatcttcaaggacgacggcaactacaagaccgcccggaggtgaagttcgagggcgacacctggtgaaccgcatcga  
453 gctgaagggcactcgaactcaaggagcagcgaacatcctggggcacaagctggagtacaactacaacagccactaggctatataatgccc  
454 gacaagcagaagaacggatcaaggtgaactcaagatccgccacaacatcgaggacggcagcgtgcagctgccgaccactaccagca  
455 gaacacccccatcggcgacggccccgtgctgctgcccgacaaccactacctgagcaccagtcgccctgagcaaaagacccaacgaga  
456 agcgcgatcacatgctcgtggtgagttcgtgaccggccgggatcccatgtggcatggacgagctgtacaacatcacatcacatcac  
457 taagaattctagagctcgtgatcagcctcactgctgctctagttgccagcatctgtgttggccctccccctgcttcttgacctgga

458 aggtgccactcccactgtcctttcctaataaaatgaggaatgcatcgcattgtctgagtaggtgcattctattctggggggtggggtggggc  
459 aggcagcaagggggaggattgggaagagaatagcaggcatgctggggagcggccgcaggaaccctagtgatggagttggccactcc  
460 ctctctgcgcgctcgcctcactgaggccgggaccaaaggtcggccgacggccgggctttgccggggcggcctcagtgagcgagc  
461 gagcgcgacgtgcctgcagggggcgcctgatcgggtatftttccttacgatctgtcgggtatftcacaccgcatacgtcaaagcaacctag  
462 tacgcgcctgtagcggcgcattaagcggcggggtgtggtggttacgcgcagcgtgaccgctacactggcagcgcctagcggccgctc  
463 ctttcgctttctcccttcttctcggcagttcggcggctttccccgtaagctcaaatcgggggctccctttagggttccgatttagtctttacg  
464 gcacctcgacccccaaaaaactgattgggtgatggtcacgtagtgggccatgcctgatagacggttttcggcctttgacgttggagtcca  
465 cgttcttaatagtggactctgttccaaactggacaacactcaaccctatctcgggctattctttgattataagggttttccgattcggccta  
466 ttggttaaaaaatgagctgatttaacaaaaatfaacgcgaatfttaacaaaaatfaacgtttacaatfttatggtgactctcagtacaatctgctct  
467 gatgccgcatagttaagccagccccgacacccgcaacaccgctgacgcgcctgacgggctgtctgctccggcatccgcttacagac  
468 aagctgtgaccgtctccgggagctgcatgtcagaggtttaccgctaccgaaacgcgagacgaaaggcctcgtgatacgccta  
469 ttttataaggttaatgtcatgataataatggttcttagacgtcaggtggcactttcgggaaatgtgcgcggaaccctattgttttttcta  
470 acattcaaatatgtatccgctcatgagacaataaccctgataaatgctcaataatgaaaaaggaagatgagattcaacatttccgtgct  
471 gccctattccctttttggcgattttgcttctgttttctcaccagaaacgctggtgaaagtaaaagatgctgaagatcagttgggtgcacg  
472 agtgggttacatcgaactggatctcaacagcggtaagatccttgagagtttcgccccgaagaactttccaatgatgagcactttaaagtct  
473 gctatgtggcgcggtattatcccgtattgacggcggcaaggaactcggctgcgcgatacactattctcagaatgacttgggtgagttactca  
474 ccagtcacagaaaagcattctacggatggcatgacagtaagagaattatgcagtctccataaccatgagtgataacactcggccaactta  
475 cttctgacaacgatcggaggaccgaaggagctaaccgctttttgcacaacatgggggatcatgtaactgccttgatcgttgggaaccggag  
476 ctgaatgaagccatacacaacgacgagcgtgacaccacgatgctgtagcaatggcaacaacgttcgcaaaactttaactggcgaactact  
477 tactctagcttccggcaacaatfaactgactggatggagcgggataaagttgcaggaccacttctgcgctcggccctccggctggctggtt  
478 attgctgataaatctggagccggtgagcgtggaagccggtatcattgcagcactggggccagatggttaagccctcccgtatcgtagtatct  
479 acacgacggggagtcaggcaactatggatgaacgaatagacagatcgtgagataggtgctcactgattaagcattggttaactgtcagac  
480 caagttactcatataactttagattgatttaaaactcatttttaatttaaaaggatctaggtgaagatccttttgataatcctcatgacaaaaatccct  
481 aacgtgagtttcttccactgagcgtcagaccccgtagaaaagatcaaaaggatcttcttgatcctttttctgcgctaactctgctgcttgc  
482 acaaaaaaccaccgctaccagcgggtggtttgttccggatcaagagctaccaactctttccgaagtaactggcttcagcagagcgcag  
483 ataccaaaactgtccttctagtgtagccgtatgaggccaccactcaagaactctgtagcaccgctacatacctcgtctgtaactcgttac  
484 cagtggctgctgccagtgccgataagtcgtcttaccgggtgactcaagacgatagttaccggataaggcgcagcggctcgggctgaacg  
485 gggggtctgtcacacagcccagcttgagcgaacgacacacgaactgagatacctacagcgtgagctatgaaagcggcagcctc  
486 ccgaagggaagggcggacaggtatccggttaagcggcagggctggaacaggagagcgcacgagggagctccagggggaaacgcct  
487 ggtatctttatagctcctgtcgggttccaccctgacttgagcgtcgtatftttgatgctcgtcagggggcggagcctatgaaaaacgcc  
488 agcaacgcggccttttaccggttctgcttggccttttctcactatggcttctgctaccccaccggtcggactagcctatttttaactgct  
489 atttctagctctaaacaaaaaatggcggaaacccgggaatctaaccggctgaacggatttagatccattcgtatcatgatcaggttcc  
490 cgggttctcgtcctttccacaagatataaaagccaagaaatcgaataactttcaagttacggtaagcatatgatagtcattttaaacaataattta  
491 aaactgcaactaccaagaatattactttctacgtcacgtatfttgactaataatctttgtttacagtcacaattaattccaattatctctaacag  
492 cctgtatcgtatatacaaatgaaggaatcatgggaatagccctcacatgtgagcactagccggactagccttatttaactgctatttcta  
493 gctctaaaaacaaaaatggcggaaacccgggaatcaaccggctgaacggatttagagtcattcgtatcatgatcaggttccccggtgtt  
494 tctcctttccacaagatataaaagccaagaaatcgaataactttcaagttacggtaagcatatgatagtcattttaaacaataatttaaaactg  
495 caaactaccaagaatattactttctacgtcacgtatfttgactaataatctttgtttacagtcacaattaattccaattatctctaacagccttgt  
496 atcgtatatgcaaatatgaaggaatcatgggaatagccctcacatgtgagcctcagcattgattattggaattgcttcgctaccccaccggt  
497 cggactagccttattttaaactgctatttctagctctaaacaaaaaatggcggaaacccgggaatcaaccggctgaacggatttagagtc  
498 attcgtatcatgatcaggttccccggttctgctcctttccacaagatataaaagccaagaaatcgaataactttcaagttacggttaagcatatg  
499 atagtcattttaaacaataatttaaaactgcaactaccaagaatattactttctacgtcacgtatfttgactaataatctttgttttacagtcaa  
500 attaattccaattatctctaacagcctgtatcgtatatgcaaatatgaaggaatcatgggaatagccctcacatgtgagcactagccggac  
501 tagccttattttaaactgctatttctagctctaaacaaaaaatggcggaaacccgggaatcaaccggctgaacggatttagagtcattcga



502 tctacatgatcaggtccccggtgttcctctccacagaatataaagccaagaatacgaatacttcaagttacggtgaagcatatgatagtc  
503 cattttaaacaataattttaaactgcaaaactaccaagaataattactttctacgtcacgtattttgactaataatctttggtttacagtcacaataatt  
504 ccaatfatctcttaacagccttgatcgtatgcaaatatgaaggaatcatgggaatatggccctcacatgtgagcctcagcattgattatga  
505

506 **pCMV-TAG-Htt74Q**

507 ctagaggtagaccgttacataacttacggtaaatggcccgcctggctgaccgccaacgacccccgcccattgacgtcaatagtaacgccaata  
508 gggactttccattgacgtcaatgggtggagtatttacggtaaactgccacttggcagtcacatcaagtgtatcatatgccaagtagcccccatt  
509 gacgtcaatgacggtaaattggcccgcctggcattgtgccagfacatgacctatgggacttccacttggcagtcacatctacgtattagtcac  
510 gctattaccatggtgatgcccgtttggcagtcacatcaatggcgtggatagcgggttgcactcacggggatttccaagctccacccattgacgt  
511 caatgggagtttgggttggcaccaaaatcaacgggacttccaaaatgtcgtaaacactccgcccattgacgcaaatgggaggtaggctgta  
512 cgggtgggaggtctatataagcagagctcttgtaactagagaaccactgcttactggcttctgaaatataacgactcactatagggaga  
513 cccaagctggtagctttaaaggccctctagactcaggccaccatgtatcggactcagatctatgaaggccttcagtcctcaagt  
514 cttccagcagcagcagcagcagcagcagcagcagcagcagcagcagcagcagcagcagcagcagcagcagcagcagcagcagcagcagc  
515 cagcagcagcagcagcagcagcagcagcagcagcagcagcagcagcagcagcagcagcagcagcagcagcagcagcagcagcagcagc  
516 agcagcagcagcagcagcagcagcagcagcagcagcagcagcagcagcagcagcagcagcagcagcagcagcagcagcagcagcagc  
517 cctcagcttccagccgcaattctcagctcagcggtagcggtagcggtagcggtagcggtagcggtagcggtagcggtagcggtagcggtagc  
518 attctagagctcgtgatcagcctcagctgtgcttctagtgtccagcactctgttgttgccttccccgtgcttcttaccctggaagggtg  
519 ccaactccactgtccttctaaataaaggaaatgcatcgcaatgtctgtagtgggtgcattctattctgggggggtgggtgggagcaggac  
520 agcaagggggaggattgggaagagaatagcaggcatgctggggagcggccgaggaaccctagtgtatggagtggccactccctctct  
521 ggcgctcgtcgtcactgaggccgggacaaaaggctgcccagcccgggctttgcccgggctcagtgagcagcagcagcagcagcagcagc  
522 cgcagctgcctcaggggagcctgatgggtattttctcttaccgatctgtcgggtatttcacaccgcatacgtcaaagcaacctatgtagc  
523 gccctgtagcggcgcaatagcgcggcgggtgtggtggttacgcgcagcgtgaccgctacacttgcagcgccttagcggcctctcttc  
524 gtttctctctctctctctctctctctctctctctctctctctctctctctctctctctctctctctctctctctctctctctctctct  
525 cctcagcccccaaaactgatttgggtgatggttcagtagtggccatcgcctgatagacgggttttgcctttgacgttgaggaccagctt  
526 cttaaatagtgactctgttccaaactggaacaactcaaccctatctcgggctattctttgattataagggtttgccatttcggcctattgg  
527 ttaaaaaatgagctgatttaacaaaatataacgcgaatttataacaaaatataacggttacaattttatggtgactctcagtaacatctctgatg  
528 ccgcatagtaagccagccccgacaccgccaacaccgctgacgcgcctgacgggcttctctctcccggcatcggcttacagacaagc  
529 tgtgaccgtctccgggagctgcatgtctagaggtttaccgctacaccgaaacgcgcgagacgaaaggcctctgatacgcctatttfa  
530 taggttaatgcatgataaataatggttcttagacgtcaggtggcactttcggggaatgtgcgcggaaccctatttcttattttctaaatacatt  
531 caaatatgtagcctcagacaaaactgataaatgctcaataatattgaaaaaggaaagatagtagtattcaacatttccgtctcgcct  
532 tattcccttttttggcatttttgccttctgttttgcaccagaaaagcgtggtgaaagtaaaagatgctgaagatcagttgggtgacagagtg  
533 ggttacatgaactggatctcaacagcggtaagatccttgagagtttccccgaagaactttccaatgatgagcactttaaagttctgctat  
534 gtggcgggtattatcccgtattgacgccgggcaagagcaactcggctcggcatacactattctcagaatgacttgggtgagtagtaccagtg  
535 cacagaaaagcatcttacggatggatgacagtaagagaattatgtagtctgccataaccatgtagtataactcggccaacttactctg  
536 acaacgatcggaggaccgaaggagtaaccgcttttgcacaacatgggggatcatgtaactcgccttgatcgttgggaaccggagctgaat  
537 gaagccatacacaacgacgagcgtgacaccacgatgctgtagcaatggcaacaacgttgcgcaaacatttaactggcgaactacttactct  
538 gttcccggcaacaataatagactggatggaggcgataaagttgcaggaccacttctgcgctcggccttccggctggctggttattgctg  
539 ataaatctggagccggtgagcgtggaagccggttatctgagcactggggccagatggtaagccctccgctatgtagttatctacacga  
540 cggggagtcaggcaactatggatgaacgaaatagacagatcgtgagataggctcctactgattaagcattgtaactgtcagaccaagttt  
541 actcatalatactttgattgattttaaactcatttttaattaaaggatctaggtaagatccttttgataatctcatgacaaaatccctaacggt  
542 agtttcttccactgagcgtcagaccccgtagaaaagatcaaaggatcttctgagatcctttttctgcgcgtaatctgctgctgcaaaaa  
543 aaaaccaccgctaccagcgggtgtttgttgcggatcaagagctaccaactcttttccgaagtaactggcttccagcagcagcagcagatacca  
544 aatactgctcttagttagcctgtagtagccaccactcaagaactctgtagcaccgctacatacctcgtctgctaatctgttaccagtg  
545 gctgctgccagtgccgataagctgtgcttaccgggttgactcaagacgatagttaccggataagggcgcagcggctgggctgaacggggg

546 gttcgtgcacacagcccagcttgagcgaacgacctacaccgaactgagatactacagcgtgagctatgagaaagcggccacgctcccga  
547 agggagaaaagcggacaggtatccggtaagcggcagggctggaacaggagagcgcacgaggggagcttcagggggaaacgctggta  
548 tctttatagctcgtcgggttcgccacctgacttgagcgtcgtatgttgatgctcgtcagggggcggagcctatggaaaaacgccagca  
549 acgcggcctttttacggctcctggccttttctgctgaccttctcacatggctcgtacccaccggctggactagccttatttaactgctatttct  
550 agctctaaaaacaaaaatggcggaaaccccggaatctaaccggctgaacggatttagagtcattcattgatcatgatcaggtcccgggtg  
551 ttcgctctttccacaagatatataaagccaagaaatcgaatactttcaagttacggtaagcatatgatagtcattttaaaacataattttaaact  
552 gcaaacaccacaagaaattactttctacgtcacgtattttgtactaatactttgtgtttacagcaaaftaattccaattatctcttaacagcctg  
553 tatcgtatatgcaaatatgaaggaatcatgggaaataggccctcacatgtgagcactagccggactagccttatttaactgctatttctagctct  
554 aaaaacaaaaatggcggaaaccccggaatctaaccggctgaacggatttagagtcattcattgatcatgatcaggtcccgggtgttcgctc  
555 cttccacaagatatataaagccaagaaatcgaatactttcaagttacggtaagcatatgatagtcattttaaaacataattttaaactgcaaac  
556 taccacaagaaattactttctacgtcacgtattttgtactaatactttgtgtttacagcaaaftaattccaattatctcttaacagcctgtatcgta  
557 tatgcaaatatgaaggaatcatgggaaataggccctcacatgtgagcctcagcattgattattggaattgcttcgctacccaccggctggact  
558 agccttatttaactgctatttctagctctaaaacaaaaatggcggaaaccccggaatctaaccggctgaacggatttagagtcattcattgat  
559 ctacatgatcaggtcccgggtgttcgctctttccacaagatatataaagccaagaaatcgaatactttcaagttacggtaagcatatgatagtc  
560 attttaaaacataattttaaactgcaaacaccacaagaaattactttctacgtcacgtattttgtactaatactttgtgtttacagcaaaftaattc  
561 caattatctcttaacagcctgtatcgtatatgcaaatatgaaggaatcatgggaaataggccctcacatgtgagcactagccggactagcctta  
562 ttttaactgctatttctagctctaaaacaaaaatggcggaaaccccggaatctaaccggctgaacggatttagagtcattcattgatcatgat  
563 atcaggtcccgggtgttcgctctttccacaagatatataaagccaagaaatcgaatactttcaagttacggtaagcatatgatagtcattttaaa  
564 acataattttaaactgcaaacaccacaagaaattactttctacgtcacgtattttgtactaatactttgtgtttacagcaaaftaattccaattatc  
565 tcttaacagcctgtatcgtatatgcaaatatgaaggaatcatgggaaataggccctcacatgtgagcctcagcattgattattga

566

567 **8xHis-Histone3.3(K64tag)**

568 ctagaggtagccgttacataacttacggtaaatggcccgcctggctgaccgccaacgacccccgccattgacgtcaatagtaacgccaata  
569 gggactttccattgacgtcaatgggtggagtatttacggtaaactgccacttggcagtagatcaagtgtatcatatgccaagtagccccctatt  
570 gacgtcaatgacggtaaattggcccgcctggcattgtgccagtagatgacctatgggactttcctacttggcagtagatctacgtattagtcac  
571 gctattaccatgggtgatgcccgttttggcagtagatcaatggcgtggatagcgggttgactcacggggatttccaagtccacccccattgacgt  
572 caatgggagttgttttggcaccacaaatcaacgggactttccaaaatgtcgaacaactcggccccattgacgcaaatgggcggtagggcgtgta  
573 cgggtgggaggtctatataagcagagctcttggtactagagaaccactgcttactggcttctcgaatataacgactcactatagggaga  
574 cccaagctggtagcgtttaacggccctctagaatgcatcaccatcaccatcaccatcaccggaatggcccgaaccaagcagactgcccgcg  
575 caagtcaacgggtggcaagggcgcgcaagcagctggccaccaaggtggctcgaagagcgcacctgccactggcggcgtgaagaag  
576 ccgaccgctaccggcccggcagcgggtggccttcgcgagatcccgctaccagaagtcactgagctgctaatccgtagtggccttcca  
577 gcggctgatgcccagatcgtcaggactttaaaccgacctgcccctcagagctcggccgtgatggcgtcagggagcgtgcgagctc  
578 tacctgggtgggctgtttgaggacaccaactgtgtgtcatccatgcaaacgggtcaccatcatgcctaaggacatccagctggcacgccgt  
579 atccgcccgggagcggccgtggatccgagctcggtaaccaagcttaagttaccctacgacgtgcccactagcccgtggagcatacccct  
580 acgacgtgcccactagcccgtggagcatacccctacgacgtgcccactagcctaaccatcaccatcactaagaattcctagagctcgc  
581 tgatcagcctcactgtgcttctagtgtccagccatctgtgtttgccctccccctgccccttacccttggagggtgccactcccactgtcc  
582 tttcctaataaaatgaggaaatgcatcgtcattgtctgagtaggtgtcattctattctgggggggtgggggtggggcaggacagcaagggggagg  
583 attgggaagagaatagcaggcatgctggggagcggccgaggaaccctagtgtatggagttggccactcccctctcgcgcgtcgcctcgt  
584 cactgagcccgggcgaccaaggtcggcggcggccttggcccggcggcctcagtgagcagcagcagcgcgagcgtgcctgcag  
585 gggcgcctgatcgggtatttctccttacgcatctgtcgggtatttcacaccgatacgtcaaagcaaccatagtagcgcacctgtagcggcgc  
586 attaaagcggcgggtgtgtgtgttacgcgcagcgtgaccgctacacttgcagcggccctagcggccgctccttctccttctccttcttct  
587 cggcacgtcggcgtttcccgtcaagctctaaatcggggctccccttaggggtccgatttagtgccttacggcacctcgaacccccaaaac  
588 ttgatttgggtgatggtcacgtatgggcatcggcctgatagacgggttttggcctttgacgttggagtcacgttcttaaatagtgactctgt  
589 tccaaactggaacaacactaacctatctcgggctattctttgattataagggttttccgatttggcctattggttaaaaatgagctgattt

590 aacaaaaatftaacgcaatfttaacaaaatftaacgftttacaatfttatgggtgactctcagtacaatctgctctgatccgcatagftaaagccag  
591 ccccgacaccgccaacaccgctgacgcgcctgacggcctgtctctccggcatccgcttacagacaagctgtgaccgtctccggga  
592 gctgcatgtgtcagaggtttaccgctacaccgaaacgcgcgagacgaaagggcctcgtgatacgcctatftttatagftaatgtcatgata  
593 ataatggttcttagacgtcaggtggcacttttcggggaaatgtgcgcggaacccctattgtttatfttttaataacattcaaatatgtatccgctca  
594 tgagacaataaccctgataaatgctcaataatattgaaaaaggaagatgatgattcaacattccgctgctgcacctattccctttttgcgga  
595 tttgacctctgttttgcacccagaacgctgggtgaaagtaaaagatgctgaagatcagttgggtgacagtgagggtfacatcgaactggat  
596 ctcaacagcggtaagatccttgagagtttcgcccgaagaacgftttccaatgatgagcactttaaagtctgctatgtggcgcggattatccc  
597 gtattgacgcccgggcaagagcaactcggcgcgcacatacactattctcagaatgactgggtgagtactaccagtcacagaaaaagcatcttac  
598 ggatggcatgacagtaagagaatftgacgtgctgcataaccatgagtgataaactgcggccaacttactctgacaacgatcggaggacc  
599 gaagagactaacgctttttgcacaacatgggggatcatgtaactgccttgatcgttgggaaccggagctgaatgaagccataccaacga  
600 cgagcgtgacaccagatgcctgtgcaatggcaaacgftgcgcaaacatttaactggcgaactacttactctagctcccggcaacaatta  
601 atagactggatggagcggataaagtgcaggaccacttctgcctcggcctccggctggctggttattgctgataaatctggagccgggtg  
602 agcgtggaagccgcggtatcattgcagcactggggccagatgtaagccctcccgtatcgtatctacacgacggggagtcaggcaact  
603 atggatgaacgaaatagacagatcgtgagataggtgcctcactgattaagcattggtaactgacagcaacttactctatatacttttagatt  
604 gatttaaaactcatttttaattaaaaggatctaggtgaagatccttttgataatctcatgacaaaatccctaacgtgagtttcgtccactgagc  
605 gtcagaccccgtagaaaagatcaaggatctcttgagatcctttttctgcgcgtaactctgctgcttcaacaaaaaaaccaccgctaccag  
606 cgggtggttgtttccggatcaagagctaccaactcttttcgaagtaactggctcagcagagcgcagataccaataactgtctcttagtgt  
607 agccgtagttaggccaccactcaagaactctgtagcaccgcctacatacctcgtctgctaactctgttaccagtggtgctgccagtgccgat  
608 aagtcgtgtcttaccgggttgactcaagacgatagttaccggataagcgcagcggctgggctgaacggggggttcgtgcacacagccca  
609 gcttgagcgaacgacacaccgaactgagatacctacagcgtgagctatgagaaagcgcacgctcccgaaggagaaaaggcggac  
610 aggtatccggtgaagcggcagggctggaacagagagcgcacgaggagctccagggggaaacgcctggtatctttatagctctgctgggtg  
611 ttcgccacctctgacttgagcgtcattttgtgatgctcgtcagggggcggagcctatggaaaaacgccgaacgcggccttttacgggt  
612 cctggccttttctgaccttttgcacatgcttcgctaccccaccggctggactagccttatttaacttctattttagctctaaaaacaaaaat  
613 ggcggaaaccccgggaatctaaccggctgaacggatttagagtcattcagatctacatgatcaggtcccgggtttctgctttccacaagat  
614 atataaagccaagaaatcgaatacttcaagttacggtaagcatatgatagtcattttaaacataatfttaaaactgcaaacaccaagaat  
615 tattactttctacgtcacgtatftttgactaataatctttgttttacagcaaaftaattccaattatctcttaacagcctgtatcgtatagcaaatatga  
616 agaatcatgggaaatagccctcacatgtgagcactagccggactagccttatttaacttctattttagctctaaaaacaaaaatggcggga  
617 aaccccgggaatctaaccggctgaacggatttagagtcattcagatctacatgatcaggtcccgggtttctgctttccacaagatataaaa  
618 gccaaagaaatcgaatacttcaagttacggtaagcatatgatagtcattttaaacataatfttaaaactgcaaacaccaagaatattactt  
619 tctacgtcacgtatftttgactaataatctttgttttacagcaaaftaattccaattatctcttaacagcctgtatcgtatagcaaatatgaaggaat  
620 catgggaaatagccctcacatgtgagcctcagcattgatttggaaftgcttcgctaccccaccggctggactagccttatttaacttctat  
621 ttctagctctaaaaacaaaaatggcggaaaccccgggaatctaaccggctgaacggatttagagtcattcagatctacatgatcaggtcccg  
622 gtgttctgctttccacaagatataaaagccaagaaatcgaatacttcaagttacggtaagcatatgatagtcattttaaacaataatfttaaa  
623 actgcaaacaccaagaatattactttctacgtcacgtatftttgactaataatctttgttttacagcaaaftaattccaattatctcttaacagcc  
624 ttgtatcgtatagcaaatatgaaggaatcatgggaaatagccctcacatgtgagcactagccggactagccttatttaacttctattttagct  
625 ctaaaaacaaaaatggcggaaaccccgggaatctaaccggctgaacggatttagagtcattcagatctacatgatcaggtcccgggtttctg  
626 tctttccacaagatataaaagccaagaaatcgaatacttcaagttacggtaagcatatgatagtcattttaaacaataatfttaaaactgcaa  
627 actaccaagaatattactttctacgtcacgtatftttgactaataatctttgttttacagcaaaftaattccaattatctcttaacagcctgtatcg  
628 tatatgcaaatatgaaggaatcatgggaaatagccctcacatgtgagcctcagcattgattattga

629

630 **pCMV-Vimentin(N116tag)**

631 ctgaggtaccggttacataacttacggtaaatggcccgcctggctgaccgccaacgacccccgccattgacgtcaatagtaacccaata  
632 gggactttcattgacgtcaatgggtggagattttacggtaaacctcccacttggcagtcacatcaagtgtatcatatgccaagtacccccctatt  
633 gacgtcaatgacggtaaatggcccgcctggcattgtcccagtcacatgaccttatgggactttcctacttggcagtcacatctacgtattatgcatc

634 gctattaccatggtgatgcggtttggcagtacatcaatggcgtggatagcggttgactcacggggattccaagtccacccattgacgt  
635 caatgggagttgtttggcaccaaaatcaacgggactttccaaaatgtcgaacaactccgcccattgacgcaaatgggcggtaggcgtgta  
636 cgggtgggaggtctatataagcagagctctctggctaactagagaaccactgcttactggcttctcgaataatacagactcactatagggaga  
637 cccaagctggctagcgtttaaacgggccctctagactcagggccacatgagctccaccaggtccgtgtcctctgctcctaccgcaggtatg  
638 tcggcgcccgggaccgcgagccggccgagctccagccggagctacgtgactacgtccaccgcacctacagcctgggcagcgcgt  
639 gcgccccagcaccagccgagcctctacgcctctccccggggcggtgatgccacgcgctcctctgcccgtgcccgtcgggagcagcgt  
640 gcccggggtcggctctcagaggactcggggacttctcgtggccgacgccatcaacaccgagttcaagaacaccgcaccaacgagaa  
641 ggtggagctgcaggagctgaatgaccgcttcgcttagtacatcgacaagggtgcgcttctggagcagcagaataagatcctgctggccgag  
642 ctgagcagctcaaggccaaaggcaagtcgcccgtggggacctctacgaggaggagatgcgggagctgcgccggcaggtggaccag  
643 ctaaccaacgacaaaagcccgcgtcaggtggagcgcgacaacctggccgaggacatcatgcgctccgggagaaatgcaggaggagat  
644 gcttcagagagaggaagccgaaaacacctgcaatcttcagacaggatgtgacaatcgtctctggcacgcttgaccttgaacgcaaagt  
645 ggaatctttgcaagaagagattgcccctttgaagaaactccacgaagaggaatccaggagctgcaggctcagattcaggaacagcatgtcca  
646 aatcgatgtggatgttccaagcctgacctcacggctgcctcgtcgtacgtcagcaatatgaaagtgtggctgccaagaacctgcagga  
647 ggcagaagaatggtacaaatccaagttgtgacctctctgaggctgccaaccggaacaatgaccccctgcccaggcaagcaggagctc  
648 actgagtaccggagacaggtcagtcctcacctgtgaagtggatgccctaaaggaaccaatgagtcctggaacgccagatgcgtgaaat  
649 ggaagagaactttccgttgaagctgtaactaccaagacactattggcccctgcaggatgagattcagaatatgaaggagaaatggctc  
650 gtcacctcgtgaataccaagacctgctcaatgttaagatggcccctgacattgagattgccacctacaggaagctcgtggaaggcaggaga  
651 gcaggattctctgcctcttccaaactttccctcctgaacctgagggaaactaatctggattcactccctctggttgataccactcaaaaaggac  
652 acttctgattaagacggttgaaactagagatggacaggtatcaacgaaactctcagatcacgatgacctgaaaagcttaagttaccctacg  
653 acgtgccgactacgccgctggagcatacccctacgacgtcccgactacgccgctggagcatacccctacgacgtcccgactacgccta  
654 accatcacatcactaagaattctagagctcgtgatcagcctcactgtgcttctagtccagccatctgttgttcccctccccgctgct  
655 tcctgacctggaaggtgccactcccactgtccttcttaataaaatgaggaaattgcatcgcattgtctgagtaggtgctattctattctggggg  
656 gtggggtggggcaggacagcaagggggaggattgggaagagaatagcaggcatgctggggagcggccgaggaacctatgtagtg  
657 agttggccactcctctctcgcgctcgtcgtcactgaggccggcgaccaaaaggtcggccgacggccggcttggccggggcgcctc  
658 agtgagcagcgcgagcgcgagctgcctgcaggggagcctgatcgggtatttctccttacgcatctgtcgggtatttcacaccgcatacgtca  
659 aagcaaccatagtacgcgcccctgtagcggcgcaatgaagcggcggtgtgggttacgcgcagcgtgaccgctacacttgcagcggc  
660 ctagegccgctccttccgttcttccctccttctcgcacgtcgcggcttccccgtcaagcttaaatgggggctccccttaggggtccg  
661 attagtgtttacggcacctcagccccaaaaactgatttgggtgatggttacgtagtgggccatcgcctgatagacggttttccgcttgg  
662 acgttggagtcacgttcttaatagtgactcttgcacaaactggaacaacactcaaccctatctcgggctattctttgattataagggattttg  
663 ccgatttcggcctattggttaaaaaatgagctgatttaacaaaaatcaacgcgaatttaacaaaatataacgtttacaatttatggtgactctca  
664 gtacaatctgctctgatccgcatagttaagccagccccgacaccgccaacaccgctgacgcgcccctgacgggcttctctcctccggca  
665 tccgcttacagacaagctgtgaccgtcctcgggagctgcatgtgtcagaggtttaccgctatcaccgaaacgcgcgagacgaaagggcct  
666 cgtgatacgcctattttataggttaatgtcatgataataatggttcttagacgtcaggtggcacttttcggggaaatgtgcgcggaaccctatt  
667 gtttattttctaaatacattcaaatatgtatccgctcatgagacaataacctgataaatgcttcaataatgaaaaaggaagatgatgattc  
668 aacattccgtgtcgccttattcctttttgcggcattttgccttctgttttgcaccagaaacgctgggtgaaagtaaaagatgctgaagatc  
669 agttgggtgcacgagtggtttacatcgaactggaatcacaacgggtaagatcctttagagattttcggccgaagaacgtttccaatgatgag  
670 cacttttaaagttctgctatgtggcgggtattatcccgtattgacggggcaaggaactcggctgccgatacactattctcagaatgactt  
671 ggttgagtactaccagtcacagaaaagcatcttacggatggcatgacagtaagagaattatgcagtgctgccataacctgagtgataaact  
672 gcggcaacttactctgacaacgatcggaggaccgaaggactaacgctttttgcacaacatgggggatcatgtaactgccttgatcgtt  
673 gggaaccggagctgaatgaagccatacacaacgacgagcgtgacaccacgatcctgtagcaatggcaacaacgttcgcaaacattaaac  
674 tggcgaacttactctagcttcccggcaacaatlaagactggatggaggggataaagtgcaggaccacttctcgtcctggccctccg  
675 gctggctggttattgctgataaatctggagccggtagcgtggaagccgggtatcattgcagcactggggccagatggttaagccctccgt  
676 atcgtagtattctacagcggggagtcaggcaactatggatgaacgaaatagacagatcgtgagataggtgcctcactgattaagcattggt  
677 aactgtcagaccaagttactcatatatactttagattgtttaaactcatttttaatttaaagatctaggtgaagatccttttgataatctatga

678 ccaaaatccctaacgtgagtttccactgagcgtcagaccccgtagaaaagatcaaaggatcttctgagatcctttttctgcgtaatc  
679 tgctgctgcaaacaaaaaccaccgctaccagcgggtgttggccggatcaagagctaccaactctttccgaaggtaactggcttcag  
680 cagagcgcagataccaatactgtccttctagtgtagccgtagttaggccaccactcaagaactctgtagcaccgcctacatacctcgtctgc  
681 taatcctgttaccagtggctgctgccagtggcgataagtcgtgtcttaccgggtggactcaagacgatagttaccggataaggcgcagcggtc  
682 gggctgaacgggggttcgtgcacacagcccagctggagcgaacgacctacaccgaactgagatacctacagcgtgagctatgagaaag  
683 cgccacgctcccgaagggagaaaggcggacaggtatccggtaagcggcagggtcggaacaggagagcgcacgagggagctccagg  
684 gggaaacgcctggtatctttagctcgtcgggttcgccacctgacttgagcgtcgatcttctgtagctcagggggggcggagcctatg  
685 gaaaaacgccagcaacgcggccttttacggcttctggcctttgctggcctttgctcacatggcttcgctaccccaccggctcggactagcctta  
686 ttttaactgctatttctagctctaaaaacaaaaatggcggaaaccccggaatctaaccggctgaacggatftagagtcattcgatctacatg  
687 atcaggtcccgtgttctgtccttccacaagatatataagccaagaaatcgaatacttcaagttacggtaagcatatgatagtccattttaa  
688 acataattttaaactgcaaaactaccaagaaatattactttctacgtcacgtatfttactaataatcttctgtttacagtcaaaatattccaattac  
689 tcttaacagccttgatcgtatgcaaatatgaaggaaatcatgggaaataggccctcacatgtgagcactagccggactagcctattttaaact  
690 gctatttctagctctaaacaaaaaatggcggaaaccccggaatctaaccggctgaacggatftagagtcattcgatctacatgatcaggtt  
691 cccggtgttctgctttccacaagatatataagccaagaaatcgaatacttcaagttacggtaagcatatgatagtccattttaaacataatt  
692 ttaaactgcaaaactaccaagaaatattactttctacgtcacgtatfttactaataatcttctgtttacagtcaaaatattccaattatctctaac  
693 agccttgatcgtatgcaaatatgaaggaaatcatgggaaataggccctcacatgtgagcctcagcattgatttggattgcttcgctaccc  
694 caccggctggactagccttattttaaactgctatttctagctctaaaaacaaaaatggcggaaaccccggaatctaaccggctgaacggatft  
695 agagtccattcgatctacatgatcaggttccgggtgttctgctttccacaagatatataagccaagaaatcgaatacttcaagttacggtaa  
696 gcataatgatagtccattttaaacataattttaaactgcaaaactaccaagaaatattactttctacgtcacgtatfttactaataatcttctgttta  
697 cagtcaaaatattccaattatctcttaacagccttgatcgtatgcaaatatgaaggaaatcatgggaaataggccctcacatgtgagcactag  
698 ccggactagccttattttaaactgctatttctagctctaaaaacaaaaatggcggaaaccccggaatctaaccggctgaacggatftagagtc  
699 cattcgatctacatgatcaggttccgggtgttctgctttccacaagatatataagccaagaaatcgaatacttcaagttacggtaagcatat  
700 gatagtcattttaaacataattttaaactgcaaaactaccaagaaatattactttctacgtcacgtatfttactaataatcttctgtttacagtc  
701 aattaattccaattatctcttaacagccttgatcgtatgcaaatatgaaggaaatcatgggaaataggccctcacatgtgagcctcagcattg  
702 attattga

703
